# Supplementary material for: Regional environment variations and management practices likely influence gut gene expression in Bt-resistant pink bollworm (Pectinophora gossypiella) from the northern and southern parts of India
Source: Research Square preprint supplement (doi:10.21203/rs.3.rs-7098200/v1), 2025-08-12
Supplement: Supplementary file 1 [file 87e853643e662c336d4b33c2.xlsx]

## Sheet: KEGG_PBW-BtS vs. nPBW-BtR_up
##Databases: KEGG PATHWAY
##Statistical test method: hypergeometric test / Fisher's exact test
##FDR correction method: Benjamini and Hochberg
#Term	Database	ID	Input number	Background number	P-Value	Corrected P-Value	Input	Hyperlink
Ribosome biogenesis in eukaryotes	KEGG PATHWAY	bmor03008	32	69	1.35005e-13	1.20154e-11	XP_049874071.1|XP_049872696.1|XP_049878626.1|XP_049874029.1|XP_049886023.1|XP_049869443.1|XP_049882315.1|XP_049873842.1|XP_049883349.1|XP_049874322.1|XP_049874578.1|XP_049888009.1|XP_049878285.1|XP_049872094.1|XP_049869804.1|XP_049883520.1|XP_049880904.1|XP_049871276.1|XP_049881827.1|XP_049871212.1|XP_049874737.1|XP_049866377.1|XP_049882191.1|XP_049869955.1|XP_049874361.1|XP_049867935.1|XP_049887…	http://www.genome.jp/kegg-bin/show_pathway?bmor03008/bmor:100862801%09red/bmor:101735934%09red/bmor:693087%09red/bmor:101739847%09red/bmor:101737534%09red/bmor:101746403%09red/bmor:101735526%09red/bmor:101735374%09red/bmor:101745253%09red/bmor:732976%09red/bmor:101742458%09red/bmor:101735989%09red/bmor:101744752%09red/bmor:101745565%09red/bmor:101736688%09red/bmor:101744824%09red/bmor:101742289%0…
RNA polymerase	KEGG PATHWAY	bmor03020	10	29	0.000264143	0.0117544	XP_049874411.1|XP_049869441.1|XP_049871134.1|XP_049877701.1|XP_049865546.1|XP_049879620.1|XP_049883543.1|XP_049884289.1|XP_049873584.1|XP_049878714.1	http://www.genome.jp/kegg-bin/show_pathway?bmor03020/bmor:101740659%09red/bmor:100379192%09red/bmor:101745151%09red/bmor:101737098%09red/bmor:101743619%09red/bmor:693115%09red/bmor:101745139%09red/bmor:101741060%09red/bmor:101744943%09red/bmor:101744611%09red
Spliceosome	KEGG PATHWAY	bmor03040	19	120	0.00375786	0.111483	XP_049881486.1|XP_049866663.1|XP_049870368.1|XP_049874717.1|XP_049869593.1|XP_049869246.1|XP_049868467.1|XP_049874361.1|XP_049865964.1|XP_049881352.1|XP_049874930.1|XP_049874405.1|XP_049879746.1|XP_049880928.1|XP_049874517.1|XP_049887642.1|XP_049875779.1|XP_049873314.1|XP_049873823.1	http://www.genome.jp/kegg-bin/show_pathway?bmor03040/bmor:692813%09red/bmor:101741443%09red/bmor:732985%09red/bmor:733079%09red/bmor:732955%09red/bmor:101738508%09red/bmor:101737609%09red/bmor:101742693%09red/bmor:693094%09red/bmor:101736496%09red/bmor:101740068%09red/bmor:101738634%09red/bmor:101745281%09red/bmor:100036587%09red/bmor:732932%09red/bmor:692822%09red/bmor:101741170%09red/bmor:10003…
Caffeine metabolism	KEGG PATHWAY	bmor00232	5	12	0.00505527	0.11248	XP_049875311.1|XP_049874983.1|XP_049874984.1|XP_049867765.1|XP_049875312.1	http://www.genome.jp/kegg-bin/show_pathway?bmor00232/bmor:100126537%09red/bmor:101741112%09red/bmor:101738607%09red/bmor:692757%09red
Other types of O-glycan biosynthesis	KEGG PATHWAY	bmor00514	4	13	0.02722	0.420753	XP_049886201.1|XP_049866967.1|XP_049887250.1|XP_049865990.1	http://www.genome.jp/kegg-bin/show_pathway?bmor00514/bmor:101746748%09red/bmor:101740832%09red/bmor:100144549%09red/bmor:692614%09red
DNA replication	KEGG PATHWAY	bmor03030	7	36	0.0283654	0.420753	XP_049876576.1|XP_049870737.1|XP_049864982.1|XP_049880386.1|XP_049866479.1|XP_049887428.1|XP_049884421.1	http://www.genome.jp/kegg-bin/show_pathway?bmor03030/bmor:101741812%09red/bmor:732919%09red/bmor:101746848%09red/bmor:101736457%09red/bmor:101742226%09red/bmor:101743300%09red/bmor:101736794%09red
Non-homologous end-joining	KEGG PATHWAY	bmor03450	3	8	0.0368756	0.468847	XP_049880386.1|XP_049888135.1|XP_049877459.1	http://www.genome.jp/kegg-bin/show_pathway?bmor03450/bmor:101745535%09red/bmor:692385%09red/bmor:101741812%09red
Phenylalanine metabolism	KEGG PATHWAY	bmor00360	3	11	0.0696269	0.7746	XP_049869979.1|XP_049873056.1|XP_049869921.1	http://www.genome.jp/kegg-bin/show_pathway?bmor00360/bmor:101746796%09red/bmor:692675%09red/bmor:101742749%09red
Base excision repair	KEGG PATHWAY	bmor03410	4	21	0.0933204	0.806418	XP_049866479.1|XP_049870737.1|XP_049880386.1|XP_049879687.1	http://www.genome.jp/kegg-bin/show_pathway?bmor03410/bmor:101736457%09red/bmor:101742226%09red/bmor:101741017%09red/bmor:101741812%09red
Homologous recombination	KEGG PATHWAY	bmor03440	5	30	0.0944555	0.806418	XP_049864982.1|XP_049872456.1|XP_049870737.1|XP_049888135.1|XP_049866149.1	http://www.genome.jp/kegg-bin/show_pathway?bmor03440/bmor:101740057%09red/bmor:101742226%09red/bmor:732919%09red/bmor:692385%09red/bmor:101735303%09red
Aminoacyl-tRNA biosynthesis	KEGG PATHWAY	bmor00970	6	40	0.0996697	0.806418	XP_049879516.1|XP_049873332.1|XP_049869968.1|XP_049869123.1|XP_049876324.1|XP_049865257.1	http://www.genome.jp/kegg-bin/show_pathway?bmor00970/bmor:101737306%09red/bmor:101743331%09red/bmor:101737924%09red/bmor:101740404%09red/bmor:101746251%09red
Ribosome	KEGG PATHWAY	bmor03010	14	126	0.112096	0.831381	XP_049879171.1|XP_049877494.1|XP_049880890.1|XP_049871736.1|XP_049874866.1|XP_049870463.1|XP_049886492.1|XP_049870279.1|XP_049869600.1|XP_049879202.1|XP_049869442.1|XP_049877670.1|XP_049871043.1|XP_049876428.1	http://www.genome.jp/kegg-bin/show_pathway?bmor03010/bmor:101739135%09red/bmor:101736359%09red/bmor:101745044%09red/bmor:100101172%09red/bmor:101739965%09red/bmor:101742656%09red/bmor:101744946%09red/bmor:692706%09red/bmor:101742782%09red/bmor:101741005%09red/bmor:101746284%09red/bmor:101736605%09red/bmor:101746056%09red/bmor:778516%09red
Toll and Imd signaling pathway	KEGG PATHWAY	bmor04624	5	38	0.179673	1	XP_049866265.1|XP_049876812.1|XP_049869815.1|XP_049874553.1|XP_049872293.1	http://www.genome.jp/kegg-bin/show_pathway?bmor04624/bmor:101744654%09red/bmor:100529236%09red/bmor:101738751%09red/bmor:100136938%09red
Ubiquinone and other terpenoid-quinone biosynthesis	KEGG PATHWAY	bmor00130	2	10	0.203124	1	XP_049869979.1|XP_049873056.1	http://www.genome.jp/kegg-bin/show_pathway?bmor00130/bmor:101746796%09red/bmor:101742749%09red
RNA transport	KEGG PATHWAY	bmor03013	12	122	0.227777	1	XP_049873942.1|XP_049870665.1|XP_049870807.1|XP_049886023.1|XP_049876160.1|XP_049873811.1|XP_049872609.1|XP_049887187.1|XP_049870017.1|XP_049879587.1|XP_049869804.1|XP_049865446.1	http://www.genome.jp/kegg-bin/show_pathway?bmor03013/bmor:101740544%09red/bmor:733081%09red/bmor:693102%09red/bmor:693087%09red/bmor:101736857%09red/bmor:101742218%09red/bmor:101743750%09red/bmor:692986%09red/bmor:101742253%09red/bmor:101745001%09red/bmor:101735721%09red/bmor:692781%09red
RNA degradation	KEGG PATHWAY	bmor03018	7	65	0.237655	1	XP_049866533.1|XP_049869246.1|XP_049884807.1|XP_049887594.1|XP_049864956.1|XP_049875779.1|XP_049867000.1	http://www.genome.jp/kegg-bin/show_pathway?bmor03018/bmor:101738613%09red/bmor:732955%09red/bmor:101737211%09red/bmor:101741788%09red/bmor:101745492%09red/bmor:101738634%09red/bmor:101744020%09red
Tyrosine metabolism	KEGG PATHWAY	bmor00350	4	34	0.273825	1	XP_049869979.1|XP_049873056.1|XP_049869921.1|XP_049886282.1	http://www.genome.jp/kegg-bin/show_pathway?bmor00350/bmor:100270767%09red/bmor:101746796%09red/bmor:692675%09red/bmor:101742749%09red
One carbon pool by folate	KEGG PATHWAY	bmor00670	2	13	0.282943	1	XP_049874948.1|XP_049869968.1	http://www.genome.jp/kegg-bin/show_pathway?bmor00670/bmor:101735471%09red/bmor:101740404%09red
TGF-beta signaling pathway	KEGG PATHWAY	bmor04350	4	37	0.322094	1	XP_049876743.1|XP_049868690.1|XP_049883951.1|XP_049867175.1	http://www.genome.jp/kegg-bin/show_pathway?bmor04350/bmor:101744944%09red/bmor:101739275%09red/bmor:100174852%09red/bmor:101742424%09red
Arginine and proline metabolism	KEGG PATHWAY	bmor00330	3	27	0.350958	1	XP_049887581.1|XP_049872921.1|XP_049884612.1	http://www.genome.jp/kegg-bin/show_pathway?bmor00330/bmor:101741966%09red/bmor:100141459%09red
Vitamin B6 metabolism	KEGG PATHWAY	bmor00750	1	5	0.352905	1	XP_049883494.1	http://www.genome.jp/kegg-bin/show_pathway?bmor00750/bmor:101745817%09red
Folate biosynthesis	KEGG PATHWAY	bmor00790	4	41	0.387127	1	XP_049866816.1|XP_049879147.1|XP_049882966.1|XP_049886282.1	http://www.genome.jp/kegg-bin/show_pathway?bmor00790/bmor:101743035%09red/bmor:101746802%09red/bmor:100270767%09red/bmor:101745818%09red
Other glycan degradation	KEGG PATHWAY	bmor00511	3	29	0.389979	1	XP_049878911.1|XP_049866956.1|XP_049878920.1	http://www.genome.jp/kegg-bin/show_pathway?bmor00511/bmor:101743490%09red/bmor:101742640%09red
Drug metabolism - other enzymes	KEGG PATHWAY	bmor00983	8	93	0.411471	1	XP_049875311.1|XP_049869120.1|XP_049874983.1|XP_049875312.1|XP_049873577.1|XP_049867765.1|XP_049874984.1|XP_049885624.1	http://www.genome.jp/kegg-bin/show_pathway?bmor00983/bmor:100862830%09red/bmor:100126537%09red/bmor:101741112%09red/bmor:101738607%09red/bmor:692593%09red/bmor:692850%09red/bmor:692757%09red
Apoptosis - multiple species	KEGG PATHWAY	bmor04215	2	18	0.412958	1	XP_049866265.1|XP_049888242.1	http://www.genome.jp/kegg-bin/show_pathway?bmor04215/bmor:100529236%09red/bmor:101743831%09red
Sulfur relay system	KEGG PATHWAY	bmor04122	1	7	0.440318	1	XP_049884156.1	http://www.genome.jp/kegg-bin/show_pathway?bmor04122/bmor:101737191%09red
Glycosylphosphatidylinositol (GPI)-anchor biosynthesis	KEGG PATHWAY	bmor00563	2	20	0.461767	1	XP_049868805.1|XP_049865622.1	http://www.genome.jp/kegg-bin/show_pathway?bmor00563/bmor:101746707%09red/bmor:101737110%09red
Steroid biosynthesis	KEGG PATHWAY	bmor00100	2	20	0.461767	1	XP_049870316.1|XP_049866872.1	http://www.genome.jp/kegg-bin/show_pathway?bmor00100/bmor:101737242%09red/bmor:101738896%09red
Mismatch repair	KEGG PATHWAY	bmor03430	2	20	0.461767	1	XP_049864982.1|XP_049870737.1	http://www.genome.jp/kegg-bin/show_pathway?bmor03430/bmor:101742226%09red/bmor:732919%09red
Peroxisome	KEGG PATHWAY	bmor04146	9	112	0.474689	1	XP_049875311.1|XP_049867703.1|XP_049874984.1|XP_049866565.1|XP_049874983.1|XP_049866442.1|XP_049872915.1|XP_049867765.1|XP_049875312.1	http://www.genome.jp/kegg-bin/show_pathway?bmor04146/bmor:100126537%09red/bmor:101741112%09red/bmor:101738607%09red/bmor:101743280%09red/bmor:101738565%09red/bmor:101737781%09red/bmor:101739612%09red/bmor:692757%09red
SNARE interactions in vesicular transport	KEGG PATHWAY	bmor04130	2	21	0.485265	1	XP_049876192.1|XP_049871504.1	http://www.genome.jp/kegg-bin/show_pathway?bmor04130/bmor:101737678%09red/bmor:101735547%09red
Notch signaling pathway	KEGG PATHWAY	bmor04330	2	22	0.508112	1	XP_049866967.1|XP_049883951.1	http://www.genome.jp/kegg-bin/show_pathway?bmor04330/bmor:101744944%09red/bmor:100144549%09red
Amino sugar and nucleotide sugar metabolism	KEGG PATHWAY	bmor00520	4	50	0.528079	1	XP_049865799.1|XP_049877482.1|XP_049882724.1|XP_049867133.1	http://www.genome.jp/kegg-bin/show_pathway?bmor00520/bmor:101744821%09red/bmor:101736959%09red/bmor:692403%09red/bmor:101740590%09red
Pentose and glucuronate interconversions	KEGG PATHWAY	bmor00040	5	64	0.534496	1	XP_049873577.1|XP_049879147.1|XP_049885624.1|XP_049882966.1|XP_049877479.1	http://www.genome.jp/kegg-bin/show_pathway?bmor00040/bmor:101743035%09red/bmor:101746802%09red/bmor:100862830%09red/bmor:101746883%09red/bmor:692593%09red
mRNA surveillance pathway	KEGG PATHWAY	bmor03015	5	64	0.534496	1	XP_049874064.1|XP_049873811.1|XP_049887107.1|XP_049879587.1|XP_049886023.1	http://www.genome.jp/kegg-bin/show_pathway?bmor03015/bmor:693102%09red/bmor:733099%09red/bmor:101739716%09red/bmor:101736857%09red/bmor:692986%09red
Fatty acid elongation	KEGG PATHWAY	bmor00062	2	24	0.551766	1	XP_049865801.1|XP_049876236.1	http://www.genome.jp/kegg-bin/show_pathway?bmor00062/bmor:101735457%09red/bmor:101737655%09red
Glycerolipid metabolism	KEGG PATHWAY	bmor00561	4	53	0.571545	1	XP_049887681.1|XP_049879147.1|XP_049882966.1|XP_049877479.1	http://www.genome.jp/kegg-bin/show_pathway?bmor00561/bmor:101743035%09red/bmor:101746802%09red/bmor:101737501%09red/bmor:101746883%09red
Lysosome	KEGG PATHWAY	bmor04142	9	122	0.572006	1	XP_049877707.1|XP_049878911.1|XP_049887312.1|XP_049870863.1|XP_049870316.1|XP_049866872.1|XP_049878812.1|XP_049878920.1|XP_049868834.1	http://www.genome.jp/kegg-bin/show_pathway?bmor04142/bmor:101741653%09red/bmor:692390%09red/bmor:101742640%09red/bmor:732993%09red/bmor:692921%09red/bmor:101738896%09red/bmor:101737242%09red/bmor:101736893%09red
Pentose phosphate pathway	KEGG PATHWAY	bmor00030	2	26	0.592611	1	XP_049879212.1|XP_049884815.1	http://www.genome.jp/kegg-bin/show_pathway?bmor00030/bmor:101745880%09red/bmor:101739464%09red
Hippo signaling pathway - fly	KEGG PATHWAY	bmor04391	4	57	0.625826	1	XP_049888242.1|XP_049872523.1|XP_049883210.1|XP_049881336.1	http://www.genome.jp/kegg-bin/show_pathway?bmor04391/bmor:101743219%09red/bmor:100145913%09red/bmor:101743831%09red/bmor:692948%09red
Terpenoid backbone biosynthesis	KEGG PATHWAY	bmor00900	2	28	0.630609	1	XP_049879636.1|XP_049878184.1	http://www.genome.jp/kegg-bin/show_pathway?bmor00900/bmor:101741066%09red/bmor:101736885%09red
Galactose metabolism	KEGG PATHWAY	bmor00052	2	28	0.630609	1	XP_049879147.1|XP_049882966.1	http://www.genome.jp/kegg-bin/show_pathway?bmor00052/bmor:101743035%09red/bmor:101746802%09red
Fatty acid biosynthesis	KEGG PATHWAY	bmor00061	1	15	0.68685	1	XP_049876236.1	http://www.genome.jp/kegg-bin/show_pathway?bmor00061/bmor:101737655%09red
Fanconi anemia pathway	KEGG PATHWAY	bmor03460	2	32	0.698204	1	XP_049872456.1|XP_049873088.1	http://www.genome.jp/kegg-bin/show_pathway?bmor03460/bmor:101735303%09red/bmor:101747068%09red
Insect hormone biosynthesis	KEGG PATHWAY	bmor00981	2	32	0.698204	1	XP_049879636.1|XP_049873126.1	http://www.genome.jp/kegg-bin/show_pathway?bmor00981/bmor:101741066%09red/bmor:100127120%09red
Phagosome	KEGG PATHWAY	bmor04145	5	78	0.698286	1	XP_049878341.1|XP_049869751.1|XP_049871504.1|XP_049881336.1|XP_049870841.1	http://www.genome.jp/kegg-bin/show_pathway?bmor04145/bmor:101737678%09red/bmor:100313947%09red/bmor:100145913%09red/bmor:101739651%09red/bmor:692429%09red
Purine metabolism	KEGG PATHWAY	bmor00230	7	109	0.710585	1	XP_049875311.1|XP_049874983.1|XP_049879501.1|XP_049875312.1|XP_049867765.1|XP_049874984.1|XP_049883520.1	http://www.genome.jp/kegg-bin/show_pathway?bmor00230/bmor:100126537%09red/bmor:101741112%09red/bmor:100125606%09red/bmor:101735934%09red/bmor:101738607%09red/bmor:692757%09red
Fructose and mannose metabolism	KEGG PATHWAY	bmor00051	2	33	0.713412	1	XP_049879147.1|XP_049882966.1	http://www.genome.jp/kegg-bin/show_pathway?bmor00051/bmor:101743035%09red/bmor:101746802%09red
Mitophagy - animal	KEGG PATHWAY	bmor04137	2	33	0.713412	1	XP_049881814.1|XP_049881833.1	http://www.genome.jp/kegg-bin/show_pathway?bmor04137/bmor:101736581%09red/bmor:101736823%09red
MAPK signaling pathway - fly	KEGG PATHWAY	bmor04013	5	81	0.727643	1	XP_049888242.1|XP_049877952.1|XP_049870841.1|XP_049875757.1|XP_049887393.1	http://www.genome.jp/kegg-bin/show_pathway?bmor04013/bmor:101740816%09red/bmor:101747006%09red/bmor:100302610%09red/bmor:101743831%09red/bmor:101739651%09red
Sphingolipid metabolism	KEGG PATHWAY	bmor00600	2	34	0.727971	1	XP_049878920.1|XP_049878911.1	http://www.genome.jp/kegg-bin/show_pathway?bmor00600/bmor:101742640%09red
Basal transcription factors	KEGG PATHWAY	bmor03022	2	34	0.727971	1	XP_049877715.1|XP_049867972.1	http://www.genome.jp/kegg-bin/show_pathway?bmor03022/bmor:733002%09red/bmor:101741347%09red
Nitrogen metabolism	KEGG PATHWAY	bmor00910	1	18	0.748146	1	XP_049870215.1	http://www.genome.jp/kegg-bin/show_pathway?bmor00910/bmor:101738069%09red
Ascorbate and aldarate metabolism	KEGG PATHWAY	bmor00053	3	52	0.749794	1	XP_049873577.1|XP_049885624.1|XP_049884815.1	http://www.genome.jp/kegg-bin/show_pathway?bmor00053/bmor:100862830%09red/bmor:692593%09red/bmor:101745880%09red
Nucleotide excision repair	KEGG PATHWAY	bmor03420	2	37	0.767926	1	XP_049866479.1|XP_049870737.1	http://www.genome.jp/kegg-bin/show_pathway?bmor03420/bmor:101736457%09red/bmor:101742226%09red
Glutathione metabolism	KEGG PATHWAY	bmor00480	3	54	0.771198	1	XP_049872921.1|XP_049886183.1|XP_049884612.1	http://www.genome.jp/kegg-bin/show_pathway?bmor00480/bmor:101738946%09red/bmor:100141459%09red
Alanine, aspartate and glutamate metabolism	KEGG PATHWAY	bmor00250	2	38	0.780062	1	XP_049887581.1|XP_049872481.1	http://www.genome.jp/kegg-bin/show_pathway?bmor00250/bmor:692995%09red/bmor:101741966%09red
Glycerophospholipid metabolism	KEGG PATHWAY	bmor00564	4	72	0.787652	1	XP_049878324.1|XP_049865022.1|XP_049877473.1|XP_049887681.1	http://www.genome.jp/kegg-bin/show_pathway?bmor00564/bmor:101735985%09red/bmor:101737501%09red/bmor:101745087%09red/bmor:101740604%09red
Longevity regulating pathway - multiple species	KEGG PATHWAY	bmor04213	4	75	0.812214	1	XP_049881486.1|XP_049881543.1|XP_049883290.1|XP_049867175.1	http://www.genome.jp/kegg-bin/show_pathway?bmor04213/bmor:692822%09red/bmor:101743710%09red/bmor:100174852%09red/bmor:101742383%09red
Biosynthesis of unsaturated fatty acids	KEGG PATHWAY	bmor01040	2	42	0.823192	1	XP_049865801.1|XP_049868581.1	http://www.genome.jp/kegg-bin/show_pathway?bmor01040/bmor:101735457%09red/bmor:101743452%09red
Metabolism of xenobiotics by cytochrome P450	KEGG PATHWAY	bmor00980	3	64	0.856709	1	XP_049873577.1|XP_049866816.1|XP_049885624.1	http://www.genome.jp/kegg-bin/show_pathway?bmor00980/bmor:100862830%09red/bmor:692593%09red/bmor:101745818%09red
Glycolysis / Gluconeogenesis	KEGG PATHWAY	bmor00010	2	46	0.858567	1	XP_049866534.1|XP_049877479.1	http://www.genome.jp/kegg-bin/show_pathway?bmor00010/bmor:101746883%09red/bmor:101738228%09red
Retinol metabolism	KEGG PATHWAY	bmor00830	2	47	0.866338	1	XP_049873577.1|XP_049885624.1	http://www.genome.jp/kegg-bin/show_pathway?bmor00830/bmor:100862830%09red/bmor:692593%09red
ECM-receptor interaction	KEGG PATHWAY	bmor04512	1	27	0.869014	1	XP_049878341.1	http://www.genome.jp/kegg-bin/show_pathway?bmor04512/bmor:100313947%09red
Phototransduction - fly	KEGG PATHWAY	bmor04745	1	28	0.878194	1	XP_049881336.1	http://www.genome.jp/kegg-bin/show_pathway?bmor04745/bmor:100145913%09red
Neuroactive ligand-receptor interaction	KEGG PATHWAY	bmor04080	3	68	0.882187	1	XP_049868571.1|XP_049873031.1|XP_049880360.1	http://www.genome.jp/kegg-bin/show_pathway?bmor04080/bmor:101735694%09red/bmor:692524%09red/bmor:101746040%09red
Arachidonic acid metabolism	KEGG PATHWAY	bmor00590	1	31	0.902054	1	XP_049866816.1	http://www.genome.jp/kegg-bin/show_pathway?bmor00590/bmor:101745818%09red
Tryptophan metabolism	KEGG PATHWAY	bmor00380	1	32	0.908921	1	XP_049869921.1	http://www.genome.jp/kegg-bin/show_pathway?bmor00380/bmor:692675%09red
AGE-RAGE signaling pathway in diabetic complications	KEGG PATHWAY	bmor04933	1	32	0.908921	1	XP_049870841.1	http://www.genome.jp/kegg-bin/show_pathway?bmor04933/bmor:101739651%09red
Fatty acid metabolism	KEGG PATHWAY	bmor01212	3	74	0.912859	1	XP_049865801.1|XP_049876236.1|XP_049868581.1	http://www.genome.jp/kegg-bin/show_pathway?bmor01212/bmor:101735457%09red/bmor:101737655%09red/bmor:101743452%09red
Porphyrin and chlorophyll metabolism	KEGG PATHWAY	bmor00860	2	56	0.920495	1	XP_049873577.1|XP_049885624.1	http://www.genome.jp/kegg-bin/show_pathway?bmor00860/bmor:100862830%09red/bmor:692593%09red
Wnt signaling pathway	KEGG PATHWAY	bmor04310	3	76	0.921346	1	XP_049878273.1|XP_049883951.1|XP_049870841.1	http://www.genome.jp/kegg-bin/show_pathway?bmor04310/bmor:101744944%09red/bmor:101739651%09red/bmor:101745218%09red
Drug metabolism - cytochrome P450	KEGG PATHWAY	bmor00982	2	58	0.929331	1	XP_049873577.1|XP_049885624.1	http://www.genome.jp/kegg-bin/show_pathway?bmor00982/bmor:100862830%09red/bmor:692593%09red
N-Glycan biosynthesis	KEGG PATHWAY	bmor00510	1	36	0.931901	1	XP_049887414.1	http://www.genome.jp/kegg-bin/show_pathway?bmor00510/bmor:101741427%09red
Pyrimidine metabolism	KEGG PATHWAY	bmor00240	1	37	0.936677	1	XP_049869120.1	http://www.genome.jp/kegg-bin/show_pathway?bmor00240/bmor:692850%09red
Lysine degradation	KEGG PATHWAY	bmor00310	1	40	0.949088	1	XP_049875121.1	http://www.genome.jp/kegg-bin/show_pathway?bmor00310/bmor:101740875%09red
Cysteine and methionine metabolism	KEGG PATHWAY	bmor00270	1	42	0.95598	1	XP_049869979.1	http://www.genome.jp/kegg-bin/show_pathway?bmor00270/bmor:101742749%09red
Inositol phosphate metabolism	KEGG PATHWAY	bmor00562	1	46	0.967093	1	XP_049866534.1	http://www.genome.jp/kegg-bin/show_pathway?bmor00562/bmor:101738228%09red
Biosynthesis of amino acids	KEGG PATHWAY	bmor01230	2	75	0.97474	1	XP_049869979.1|XP_049872481.1	http://www.genome.jp/kegg-bin/show_pathway?bmor01230/bmor:692995%09red/bmor:101742749%09red
Apoptosis - fly	KEGG PATHWAY	bmor04214	1	50	0.975402	1	XP_049888242.1	http://www.genome.jp/kegg-bin/show_pathway?bmor04214/bmor:101743831%09red
Autophagy - animal	KEGG PATHWAY	bmor04140	2	85	0.986458	1	XP_049868834.1|XP_049867175.1	http://www.genome.jp/kegg-bin/show_pathway?bmor04140/bmor:692390%09red/bmor:100174852%09red
Protein processing in endoplasmic reticulum	KEGG PATHWAY	bmor04141	4	132	0.987897	1	XP_049881486.1|XP_049881543.1|XP_049883290.1|XP_049886754.1	http://www.genome.jp/kegg-bin/show_pathway?bmor04141/bmor:692822%09red/bmor:101743710%09red/bmor:733039%09red/bmor:101742383%09red
Ubiquitin mediated proteolysis	KEGG PATHWAY	bmor04120	2	88	0.988792	1	XP_049876651.1|XP_049877743.1	http://www.genome.jp/kegg-bin/show_pathway?bmor04120/bmor:733026%09red/bmor:101745791%09red
Endocytosis	KEGG PATHWAY	bmor04144	3	115	0.990789	1	XP_049881486.1|XP_049868718.1|XP_049874083.1	http://www.genome.jp/kegg-bin/show_pathway?bmor04144/bmor:692822%09red/bmor:101744531%09red/bmor:101737168%09red
FoxO signaling pathway	KEGG PATHWAY	bmor04068	1	71	0.994669	1	XP_049883951.1	http://www.genome.jp/kegg-bin/show_pathway?bmor04068/bmor:101744944%09red
Carbon metabolism	KEGG PATHWAY	bmor01200	2	126	0.999042	1	XP_049874948.1|XP_049884815.1	http://www.genome.jp/kegg-bin/show_pathway?bmor01200/bmor:101735471%09red/bmor:101745880%09red
mTOR signaling pathway	KEGG PATHWAY	bmor04150	1	96	0.999139	1	XP_049867175.1	http://www.genome.jp/kegg-bin/show_pathway?bmor04150/bmor:100174852%09red
Oxidative phosphorylation	KEGG PATHWAY	bmor00190	2	149	0.999793	1	XP_049880228.1|XP_049871145.1	http://www.genome.jp/kegg-bin/show_pathway?bmor00190/bmor:101741387%09red/bmor:101740551%09red
Metabolic pathways	KEGG PATHWAY	bmor01100	45	1142	1	1	XP_049877473.1|XP_049886282.1|XP_049865622.1|XP_049883494.1|XP_049871145.1|XP_049887414.1|XP_049879147.1|XP_049865022.1|XP_049867133.1|XP_049876236.1|XP_049882966.1|XP_049880228.1|XP_049874983.1|XP_049865801.1|XP_049877482.1|XP_049866816.1|XP_049884815.1|XP_049872481.1|XP_049867765.1|XP_049887581.1|XP_049868805.1|XP_049874984.1|XP_049885624.1|XP_049883520.1|XP_049875311.1|XP_049874948.1|XP_049869…	http://www.genome.jp/kegg-bin/show_pathway?bmor01100/bmor:101740551%09red/bmor:101746707%09red/bmor:101735934%09red/bmor:692593%09red/bmor:101741387%09red/bmor:692995%09red/bmor:101742749%09red/bmor:101741427%09red/bmor:101743452%09red/bmor:692675%09red/bmor:692757%09red/bmor:100126537%09red/bmor:101741112%09red/bmor:101738607%09red/bmor:100141459%09red/bmor:101742640%09red/bmor:101739464%09red/b…
--------------------
#Term	Database	ID	Input number	Background number	P-Value	Corrected P-Value	Input	Hyperlink
--------------------
#Term	Database	ID	Input number	Background number	P-Value	Corrected P-Value	Input	Hyperlink
--------------------

## Sheet: KEGG_PBW-BtS vs. nPBW-BTR_down
##Databases: KEGG PATHWAY
##Statistical test method: hypergeometric test / Fisher's exact test
##FDR correction method: Benjamini and Hochberg
#Term	Database	ID	Input number	Background number	P-Value	Corrected P-Value	Input	Hyperlink
Metabolic pathways	KEGG PATHWAY	bmor01100	194	1142	2.28984e-13	2.58752e-11	XP_049877263.1|XP_049882424.1|XP_049879140.1|XP_049885494.1|XP_049867475.1|XP_049874698.1|XP_049885824.1|XP_049877021.1|XP_049873907.1|XP_049883756.1|XP_049880374.1|XP_049876908.1|XP_049866893.1|XP_049872902.1|XP_049878882.1|XP_049881390.1|XP_049869643.1|XP_049871425.1|XP_049878203.1|XP_049876520.1|XP_049882450.1|XP_049870950.1|XP_049870206.1|XP_049865063.1|XP_049878259.1|XP_049867863.1|XP_049865…	http://www.genome.jp/kegg-bin/show_pathway?bmor01100/bmor:101743283%09red/bmor:101746568%09red/bmor:101740961%09red/bmor:101746766%09red/bmor:100127057%09red/bmor:101741387%09red/bmor:101745943%09red/bmor:101744897%09red/bmor:101737425%09red/bmor:101744141%09red/bmor:101741175%09red/bmor:101745064%09red/bmor:101746906%09red/bmor:733130%09red/bmor:101742176%09red/bmor:101744618%09red/bmor:692543%0…
Carbon metabolism	KEGG PATHWAY	bmor01200	36	126	1.27742e-07	7.21745e-06	XP_049875366.1|XP_049879140.1|XP_049887831.1|XP_049870336.1|XP_049885931.1|XP_049871493.1|XP_049873451.1|XP_049877862.1|XP_049877863.1|XP_049877893.1|XP_049871068.1|XP_049866298.1|XP_049881379.1|XP_049871490.1|XP_049885425.1|XP_049885840.1|XP_049886098.1|XP_049881390.1|XP_049873339.1|XP_049876520.1|XP_049865063.1|XP_049884080.1|XP_049886100.1|XP_049885889.1|XP_049867197.1|XP_049868056.1|XP_049877…	http://www.genome.jp/kegg-bin/show_pathway?bmor01200/bmor:101736083%09red/bmor:101746722%09red/bmor:101740961%09red/bmor:101746766%09red/bmor:101740619%09red/bmor:101746658%09red/bmor:101743678%09red/bmor:101736985%09red/bmor:732915%09red/bmor:101741175%09red/bmor:101742176%09red/bmor:101738798%09red/bmor:101744557%09red/bmor:101744675%09red/bmor:101741940%09red/bmor:692939%09red/bmor:101740956%0…
Biosynthesis of amino acids	KEGG PATHWAY	bmor01230	25	75	1.06075e-06	3.99549e-05	XP_049879140.1|XP_049887831.1|XP_049870336.1|XP_049885931.1|XP_049877862.1|XP_049877863.1|XP_049865319.1|XP_049884658.1|XP_049881379.1|XP_049871490.1|XP_049885840.1|XP_049881390.1|XP_049868174.1|XP_049866308.1|XP_049865063.1|XP_049869165.1|XP_049867863.1|XP_049884080.1|XP_049868175.1|XP_049877859.1|XP_049877858.1|XP_049873802.1|XP_049877860.1|XP_049866165.1|XP_049867251.1	http://www.genome.jp/kegg-bin/show_pathway?bmor01230/bmor:101736083%09red/bmor:101740961%09red/bmor:101746658%09red/bmor:101743678%09red/bmor:101736408%09red/bmor:101741446%09red/bmor:101744557%09red/bmor:101736784%09red/bmor:101741940%09red/bmor:101741659%09red/bmor:101740956%09red/bmor:101735436%09red/bmor:751838%09red/bmor:101746001%09red/bmor:101743550%09red/bmor:692848%09red/bmor:101741102%0…
Pyruvate metabolism	KEGG PATHWAY	bmor00620	15	41	6.31106e-05	0.00178287	XP_049865517.1|XP_049875366.1|XP_049879945.1|XP_049870336.1|XP_049882376.1|XP_049865063.1|XP_049867475.1|XP_049884758.1|XP_049868056.1|XP_049876520.1|XP_049868382.1|XP_049873451.1|XP_049873907.1|XP_049871173.1|XP_049865516.1	http://www.genome.jp/kegg-bin/show_pathway?bmor00620/bmor:101743474%09red/bmor:101743678%09red/bmor:101746722%09red/bmor:101736985%09red/bmor:733130%09red/bmor:101738798%09red/bmor:101746766%09red/bmor:692889%09red/bmor:101743580%09red/bmor:101741175%09red/bmor:101735616%09red/bmor:101741940%09red/bmor:101746906%09red/bmor:101740191%09red/bmor:101744897%09red
Glycine, serine and threonine metabolism	KEGG PATHWAY	bmor00260	14	39	0.000129616	0.00292933	XP_049882461.1|XP_049887024.1|XP_049885889.1|XP_049866298.1|XP_049877860.1|XP_049877858.1|XP_049885425.1|XP_049867475.1|XP_049873802.1|XP_049869165.1|XP_049877859.1|XP_049877862.1|XP_049869845.1|XP_049877863.1	http://www.genome.jp/kegg-bin/show_pathway?bmor00260/bmor:101735616%09red/bmor:101741242%09red/bmor:101743217%09red/bmor:101741659%09red/bmor:101740961%09red/bmor:101744557%09red/bmor:101743034%09red/bmor:101736784%09red/bmor:101738292%09red/bmor:101744428%09red/bmor:101746658%09red/bmor:101736065%09red/bmor:101741102%09red/bmor:101737288%09red
Valine, leucine and isoleucine biosynthesis	KEGG PATHWAY	bmor00290	6	6	0.000254417	0.00479153	XP_049865319.1|XP_049877860.1|XP_049877858.1|XP_049877859.1|XP_049877862.1|XP_049877863.1	http://www.genome.jp/kegg-bin/show_pathway?bmor00290/bmor:101741242%09red/bmor:101741659%09red/bmor:101740961%09red/bmor:101746658%09red/bmor:101736408%09red/bmor:101741102%09red
Glyoxylate and dicarboxylate metabolism	KEGG PATHWAY	bmor00630	13	39	0.000403438	0.00651265	XP_049866165.1|XP_049876520.1|XP_049866298.1|XP_049885425.1|XP_049884080.1|XP_049884658.1|XP_049884758.1|XP_049868056.1|XP_049865517.1|XP_049873451.1|XP_049885889.1|XP_049865516.1|XP_049867251.1	http://www.genome.jp/kegg-bin/show_pathway?bmor00630/bmor:101740956%09red/bmor:101735436%09red/bmor:101743217%09red/bmor:101741446%09red/bmor:101736985%09red/bmor:101740191%09red/bmor:101737646%09red/bmor:101736065%09red/bmor:101746766%09red/bmor:101746722%09red/bmor:101744428%09red/bmor:101746906%09red/bmor:101741175%09red
Glycolysis / Gluconeogenesis	KEGG PATHWAY	bmor00010	14	46	0.000524667	0.00741093	XP_049884758.1|XP_049879140.1|XP_049881379.1|XP_049870336.1|XP_049865063.1|XP_049867475.1|XP_049885931.1|XP_049879945.1|XP_049871493.1|XP_049868382.1|XP_049876066.1|XP_049881390.1|XP_049885297.1|XP_049878813.1	http://www.genome.jp/kegg-bin/show_pathway?bmor00010/bmor:101737885%09red/bmor:101743212%09red/bmor:101743678%09red/bmor:101745490%09red/bmor:101746722%09red/bmor:733130%09red/bmor:101741280%09red/bmor:101743550%09red/bmor:101740847%09red/bmor:692889%09red/bmor:732915%09red/bmor:101741940%09red/bmor:101735616%09red
Citrate cycle (TCA cycle)	KEGG PATHWAY	bmor00020	13	42	0.000720847	0.00905064	XP_049875366.1|XP_049867197.1|XP_049884080.1|XP_049884658.1|XP_049876520.1|XP_049879945.1|XP_049868056.1|XP_049886098.1|XP_049865517.1|XP_049873451.1|XP_049886100.1|XP_049865516.1|XP_049877893.1	http://www.genome.jp/kegg-bin/show_pathway?bmor00020/bmor:101740956%09red/bmor:101739338%09red/bmor:101736985%09red/bmor:733130%09red/bmor:101737646%09red/bmor:101742176%09red/bmor:101746766%09red/bmor:101740619%09red/bmor:101741175%09red/bmor:101737329%09red/bmor:101746906%09red/bmor:101740191%09red/bmor:101744897%09red
Purine metabolism	KEGG PATHWAY	bmor00230	23	109	0.0010194	0.0115192	XP_049877263.1|XP_049867145.1|XP_049870336.1|XP_049885824.1|XP_049875015.1|XP_049872155.1|XP_049884530.1|XP_049884907.1|XP_049871490.1|XP_049866893.1|XP_049879931.1|XP_049885552.1|XP_049866264.1|XP_049872942.1|XP_049872302.1|XP_049865063.1|XP_049874539.1|XP_049866366.1|XP_049876799.1|XP_049864979.1|XP_049866969.1|XP_049866368.1|XP_049876066.1	http://www.genome.jp/kegg-bin/show_pathway?bmor00230/bmor:101743020%09red/bmor:101743678%09red/bmor:101736237%09red/bmor:101745840%09red/bmor:732910%09red/bmor:101741402%09red/bmor:101737425%09red/bmor:101741806%09red/bmor:101739615%09red/bmor:101741940%09red/bmor:101737283%09red/bmor:101737205%09red/bmor:101735940%09red/bmor:101739179%09red/bmor:101744981%09red/bmor:101743212%09red/bmor:10173760…
Phosphatidylinositol signaling system	KEGG PATHWAY	bmor04070	14	53	0.00166464	0.0171004	XP_049876322.1|XP_049866710.1|XP_049883575.1|XP_049887709.1|XP_049873884.1|XP_049882583.1|XP_049885667.1|XP_049879625.1|XP_049870075.1|XP_049865518.1|XP_049878882.1|XP_049873277.1|XP_049873170.1|XP_049871886.1	http://www.genome.jp/kegg-bin/show_pathway?bmor04070/bmor:101741961%09red/bmor:101735646%09red/bmor:101745704%09red/bmor:101746568%09red/bmor:101741278%09red/bmor:101738501%09red/bmor:101742981%09red/bmor:101741396%09red/bmor:101740803%09red/bmor:101740114%09red/bmor:101741374%09red/bmor:101745952%09red/bmor:101740354%09red/bmor:101743450%09red
Amino sugar and nucleotide sugar metabolism	KEGG PATHWAY	bmor00520	13	50	0.00270455	0.0254679	XP_049878203.1|XP_049864951.1|XP_049869139.1|XP_049883129.1|XP_049877493.1|XP_049885635.1|XP_049878744.1|XP_049876908.1|XP_049874194.1|XP_049880653.1|XP_049877247.1|XP_049876066.1|XP_049881300.1	http://www.genome.jp/kegg-bin/show_pathway?bmor00520/bmor:100038345%09red/bmor:101743212%09red/bmor:692816%09red/bmor:101735679%09red/bmor:101736080%09red/bmor:101743965%09red/bmor:101743243%09red/bmor:101744836%09red/bmor:693039%09red/bmor:692647%09red/bmor:101740272%09red/bmor:101746108%09red/bmor:101745028%09red
Thiamine metabolism	KEGG PATHWAY	bmor00730	7	17	0.00348347	0.0285895	XP_049865248.1|XP_049872155.1|XP_049875109.1|XP_049866969.1|XP_049865258.1|XP_049865265.1|XP_049865249.1	http://www.genome.jp/kegg-bin/show_pathway?bmor00730/bmor:101743834%09red/bmor:101736367%09red/bmor:101736237%09red/bmor:693074%09red/bmor:692396%09red
Galactose metabolism	KEGG PATHWAY	bmor00052	9	28	0.00376837	0.0285895	XP_049869139.1|XP_049875924.1|XP_049881379.1|XP_049885635.1|XP_049869183.1|XP_049876066.1|XP_049881390.1|XP_049885297.1|XP_049878813.1	http://www.genome.jp/kegg-bin/show_pathway?bmor00052/bmor:101737885%09red/bmor:101743212%09red/bmor:101745490%09red/bmor:101735679%09red/bmor:101741280%09red/bmor:101744836%09red/bmor:101738885%09red/bmor:101736565%09red
Inositol phosphate metabolism	KEGG PATHWAY	bmor00562	12	46	0.00379507	0.0285895	XP_049866710.1|XP_049883575.1|XP_049876322.1|XP_049885667.1|XP_049879625.1|XP_049870075.1|XP_049878882.1|XP_049879151.1|XP_049873277.1|XP_049876075.1|XP_049879160.1|XP_049871886.1	http://www.genome.jp/kegg-bin/show_pathway?bmor00562/bmor:101735646%09red/bmor:100101177%09red/bmor:101746568%09red/bmor:101741278%09red/bmor:101745192%09red/bmor:101741396%09red/bmor:101745369%09red/bmor:101740803%09red/bmor:101741374%09red/bmor:101745952%09red/bmor:101740354%09red/bmor:101743450%09red
Glycerolipid metabolism	KEGG PATHWAY	bmor00561	13	53	0.00413856	0.0292286	XP_049887206.1|XP_049887709.1|XP_049877035.1|XP_049869183.1|XP_049870202.1|XP_049882583.1|XP_049883580.1|XP_049885769.1|XP_049867475.1|XP_049868382.1|XP_049869292.1|XP_049877021.1|XP_049877011.1	http://www.genome.jp/kegg-bin/show_pathway?bmor00561/bmor:101741961%09red/bmor:101745704%09red/bmor:101745715%09red/bmor:101745213%09red/bmor:101745361%09red/bmor:101735542%09red/bmor:101745230%09red/bmor:101741440%09red/bmor:692889%09red/bmor:101736437%09red/bmor:101745064%09red/bmor:101735616%09red/bmor:101736565%09red
Hedgehog signaling pathway - fly	KEGG PATHWAY	bmor04341	9	31	0.00653685	0.0434508	XP_049876672.1|XP_049872076.1|XP_049875131.1|XP_049864949.1|XP_049883343.1|XP_049865144.1|XP_049865145.1|XP_049880484.1|XP_049875133.1	http://www.genome.jp/kegg-bin/show_pathway?bmor04341/bmor:101738795%09red/bmor:101739040%09red/bmor:101736532%09red/bmor:101737144%09red/bmor:101747093%09red/bmor:100862751%09red/bmor:692674%09red
2-Oxocarboxylic acid metabolism	KEGG PATHWAY	bmor01210	7	21	0.00876209	0.0550065	XP_049868175.1|XP_049865319.1|XP_049884658.1|XP_049887831.1|XP_049867863.1|XP_049884080.1|XP_049868174.1	http://www.genome.jp/kegg-bin/show_pathway?bmor01210/bmor:101740956%09red/bmor:101736083%09red/bmor:101746001%09red/bmor:101737646%09red/bmor:101746807%09red/bmor:101736408%09red
Longevity regulating pathway - multiple species	KEGG PATHWAY	bmor04213	15	75	0.0107899	0.0641713	XP_049881920.1|XP_049864949.1|XP_049866710.1|XP_049884907.1|XP_049871162.1|XP_049878810.1|XP_049871958.1|XP_049881926.1|XP_049866893.1|XP_049881927.1|XP_049866860.1|XP_049865419.1|XP_049878898.1|XP_049881928.1|XP_049874539.1	http://www.genome.jp/kegg-bin/show_pathway?bmor04213/bmor:101741402%09red/bmor:692520%09red/bmor:101737606%09red/bmor:101740629%09red/bmor:101736532%09red/bmor:100169708%09red/bmor:101741278%09red/bmor:733093%09red/bmor:692772%09red/bmor:692487%09red/bmor:692533%09red/bmor:101739615%09red/bmor:692591%09red/bmor:692488%09red
Glycosaminoglycan degradation	KEGG PATHWAY	bmor00531	6	17	0.0120652	0.0681685	XP_049880987.1|XP_049876908.1|XP_049874194.1|XP_049877247.1|XP_049880374.1|XP_049880375.1	http://www.genome.jp/kegg-bin/show_pathway?bmor00531/bmor:100038345%09red/bmor:101735594%09red/bmor:101745028%09red/bmor:692647%09red/bmor:101742059%09red
Autophagy - animal	KEGG PATHWAY	bmor04140	16	85	0.0138584	0.0740422	XP_049880535.1|XP_049864949.1|XP_049866710.1|XP_049876322.1|XP_049879791.1|XP_049884375.1|XP_049871958.1|XP_049877925.1|XP_049881048.1|XP_049886330.1|XP_049878882.1|XP_049865419.1|XP_049879125.1|XP_049873367.1|XP_049868971.1|XP_049871886.1	http://www.genome.jp/kegg-bin/show_pathway?bmor04140/bmor:692520%09red/bmor:101740636%09red/bmor:101740431%09red/bmor:101741938%09red/bmor:101741618%09red/bmor:101745914%09red/bmor:101736532%09red/bmor:101740494%09red/bmor:100169708%09red/bmor:101741278%09red/bmor:101739525%09red/bmor:101744058%09red/bmor:101745952%09red/bmor:101745143%09red/bmor:101740354%09red/bmor:101743450%09red
Phagosome	KEGG PATHWAY	bmor04145	15	78	0.0144153	0.0740422	XP_049871805.1|XP_049881892.1|XP_049874969.1|XP_049885494.1|XP_049884235.1|XP_049871311.1|XP_049885369.1|XP_049873365.1|XP_049868898.1|XP_049887879.1|XP_049866214.1|XP_049870525.1|XP_049887824.1|XP_049887880.1|XP_049871886.1	http://www.genome.jp/kegg-bin/show_pathway?bmor04145/bmor:692512%09red/bmor:101736734%09red/bmor:100145914%09red/bmor:101737161%09red/bmor:692430%09red/bmor:101743784%09red/bmor:733120%09red/bmor:101736898%09red/bmor:100101153%09red/bmor:101743450%09red/bmor:101744975%09red/bmor:100037424%09red/bmor:101744447%09red/bmor:692429%09red
Glycerophospholipid metabolism	KEGG PATHWAY	bmor00564	14	72	0.0164115	0.0806304	XP_049884279.1|XP_049873463.1|XP_049885939.1|XP_049887206.1|XP_049887709.1|XP_049877035.1|XP_049882583.1|XP_049870418.1|XP_049883580.1|XP_049885769.1|XP_049869292.1|XP_049877021.1|XP_049883756.1|XP_049877011.1	http://www.genome.jp/kegg-bin/show_pathway?bmor00564/bmor:101737612%09red/bmor:101741961%09red/bmor:101745715%09red/bmor:101741406%09red/bmor:101745361%09red/bmor:101745704%09red/bmor:101745230%09red/bmor:101741440%09red/bmor:101736119%09red/bmor:101745213%09red/bmor:101736679%09red/bmor:101743589%09red/bmor:101736437%09red/bmor:101745064%09red
Ubiquitin mediated proteolysis	KEGG PATHWAY	bmor04120	16	88	0.0180035	0.0847667	XP_049886937.1|XP_049876458.1|XP_049882084.1|XP_049877051.1|XP_049883343.1|XP_049877002.1|XP_049877921.1|XP_049877373.1|XP_049885737.1|XP_049875865.1|XP_049867201.1|XP_049873613.1|XP_049874760.1|XP_049872549.1|XP_049885242.1|XP_049873401.1	http://www.genome.jp/kegg-bin/show_pathway?bmor04120/bmor:101739053%09red/bmor:101739865%09red/bmor:101738795%09red/bmor:101740542%09red/bmor:105842826%09red/bmor:101743923%09red/bmor:101743548%09red/bmor:101743486%09red/bmor:101739047%09red/bmor:101740182%09red/bmor:101735671%09red/bmor:101743026%09red/bmor:101739389%09red/bmor:101744303%09red/bmor:692576%09red/bmor:101746071%09red
Insect hormone biosynthesis	KEGG PATHWAY	bmor00981	8	32	0.0203845	0.0910475	XP_049881424.1|XP_049881304.1|XP_049876442.1|XP_049881303.1|XP_049874655.1|XP_049868382.1|XP_049874477.1|XP_049868221.1	http://www.genome.jp/kegg-bin/show_pathway?bmor00981/bmor:100286798%09red/bmor:692445%09red/bmor:100415790%09red/bmor:692686%09red/bmor:692889%09red/bmor:692634%09red
Pentose phosphate pathway	KEGG PATHWAY	bmor00030	7	26	0.021591	0.0910475	XP_049879140.1|XP_049881379.1|XP_049871490.1|XP_049885840.1|XP_049871493.1|XP_049876066.1|XP_049881390.1	http://www.genome.jp/kegg-bin/show_pathway?bmor00030/bmor:101743550%09red/bmor:101743212%09red/bmor:101745490%09red/bmor:733021%09red/bmor:692848%09red/bmor:732915%09red
Sulfur metabolism	KEGG PATHWAY	bmor00920	4	9	0.0217547	0.0910475	XP_049866368.1|XP_049882450.1|XP_049869412.1|XP_049866366.1	http://www.genome.jp/kegg-bin/show_pathway?bmor00920/bmor:101740027%09red/bmor:101743629%09red/bmor:101745840%09red
Oxidative phosphorylation	KEGG PATHWAY	bmor00190	23	149	0.0260407	0.104521	XP_049877864.1|XP_049870210.1|XP_049885494.1|XP_049874698.1|XP_049878434.1|XP_049877764.1|XP_049870377.1|XP_049887311.1|XP_049874969.1|XP_049885409.1|XP_049877831.1|XP_049886098.1|XP_049871943.1|XP_049884989.1|XP_049880331.1|XP_049885969.1|XP_049877143.1|XP_049884961.1|XP_049886100.1|XP_049880475.1|XP_049880356.1|XP_049871805.1|XP_049880353.1	http://www.genome.jp/kegg-bin/show_pathway?bmor00190/bmor:101743663%09red/bmor:751613%09red/bmor:101742176%09red/bmor:101739282%09red/bmor:101741387%09red/bmor:101737916%09red/bmor:101741235%09red/bmor:101744457%09red/bmor:101736488%09red/bmor:101740879%09red/bmor:733118%09red/bmor:101740387%09red/bmor:101736898%09red/bmor:101743749%09red/bmor:100037424%09red/bmor:101745754%09red/bmor:101742612%0…
Sphingolipid metabolism	KEGG PATHWAY	bmor00600	8	34	0.026824	0.104521	XP_049877035.1|XP_049868475.1|XP_049865621.1|XP_049877021.1|XP_049883892.1|XP_049888140.1|XP_049877011.1|XP_049879537.1	http://www.genome.jp/kegg-bin/show_pathway?bmor00600/bmor:101746851%09red/bmor:101745213%09red/bmor:101745361%09red/bmor:101744040%09red/bmor:101746948%09red/bmor:101741392%09red/bmor:101744377%09red/bmor:101745064%09red
Histidine metabolism	KEGG PATHWAY	bmor00340	4	10	0.0283983	0.106467	XP_049882461.1|XP_049882788.1|XP_049867475.1|XP_049868382.1	http://www.genome.jp/kegg-bin/show_pathway?bmor00340/bmor:692889%09red/bmor:101735616%09red/bmor:101737288%09red/bmor:101744680%09red
Arginine biosynthesis	KEGG PATHWAY	bmor00220	7	28	0.0292078	0.106467	XP_049868175.1|XP_049871068.1|XP_049887831.1|XP_049867863.1|XP_049866165.1|XP_049867251.1|XP_049868174.1	http://www.genome.jp/kegg-bin/show_pathway?bmor00220/bmor:101735436%09red/bmor:101741446%09red/bmor:101746001%09red/bmor:101736083%09red/bmor:101746807%09red/bmor:692939%09red
Hippo signaling pathway - fly	KEGG PATHWAY	bmor04391	11	57	0.0325438	0.11492	XP_049876041.1|XP_049873690.1|XP_049868398.1|XP_049878140.1|XP_049875008.1|XP_049873365.1|XP_049873706.1|XP_049876042.1|XP_049866284.1|XP_049868233.1|XP_049881391.1	http://www.genome.jp/kegg-bin/show_pathway?bmor04391/bmor:101746256%09red/bmor:100145914%09red/bmor:101742798%09red/bmor:101736618%09red/bmor:100216493%09red/bmor:101739220%09red/bmor:692468%09red/bmor:101745665%09red/bmor:101743997%09red/bmor:101742023%09red
Apoptosis - fly	KEGG PATHWAY	bmor04214	10	50	0.033693	0.115373	XP_049872371.1|XP_049867468.1|XP_049878849.1|XP_049877525.1|XP_049871958.1|XP_049872376.1|XP_049887960.1|XP_049875840.1|XP_049869805.1|XP_049884710.1	http://www.genome.jp/kegg-bin/show_pathway?bmor04214/bmor:101741679%09red/bmor:692520%09red/bmor:101735759%09red/bmor:100529220%09red/bmor:101738358%09red/bmor:693011%09red/bmor:101743155%09red/bmor:692756%09red/bmor:100529085%09red
Nitrogen metabolism	KEGG PATHWAY	bmor00910	5	18	0.0449158	0.149279	XP_049870343.1|XP_049871068.1|XP_049867251.1|XP_049866308.1|XP_049866165.1	http://www.genome.jp/kegg-bin/show_pathway?bmor00910/bmor:101741446%09red/bmor:101735436%09red/bmor:751838%09red/bmor:101745943%09red/bmor:692939%09red
mTOR signaling pathway	KEGG PATHWAY	bmor04150	15	96	0.058637	0.186529	XP_049866466.1|XP_049871805.1|XP_049866710.1|XP_049876322.1|XP_049883300.1|XP_049875131.1|XP_049871958.1|XP_049873762.1|XP_049874969.1|XP_049867496.1|XP_049866319.1|XP_049876074.1|XP_049865419.1|XP_049875133.1|XP_049873651.1	http://www.genome.jp/kegg-bin/show_pathway?bmor04150/bmor:692520%09red/bmor:101736611%09red/bmor:100862751%09red/bmor:101746492%09red/bmor:100169708%09red/bmor:101741278%09red/bmor:101736087%09red/bmor:101744741%09red/bmor:733120%09red/bmor:732913%09red/bmor:101745586%09red/bmor:101745952%09red/bmor:101740539%09red/bmor:100037424%09red
Arginine and proline metabolism	KEGG PATHWAY	bmor00330	6	27	0.063077	0.186529	XP_049882461.1|XP_049882967.1|XP_049887831.1|XP_049867475.1|XP_049868382.1|XP_049888168.1	http://www.genome.jp/kegg-bin/show_pathway?bmor00330/bmor:732996%09red/bmor:101736083%09red/bmor:692889%09red/bmor:692924%09red/bmor:101737288%09red/bmor:101735616%09red
ECM-receptor interaction	KEGG PATHWAY	bmor04512	6	27	0.063077	0.186529	XP_049872065.1|XP_049867060.1|XP_049866652.1|XP_049866664.1|XP_049870916.1|XP_049870409.1	http://www.genome.jp/kegg-bin/show_pathway?bmor04512/bmor:101736620%09red/bmor:101746136%09red/bmor:692625%09red/bmor:101746347%09red/bmor:101742903%09red/bmor:101745246%09red
Glycosphingolipid biosynthesis - ganglio series	KEGG PATHWAY	bmor00604	3	8	0.0643361	0.186529	XP_049874194.1|XP_049876908.1|XP_049877247.1	http://www.genome.jp/kegg-bin/show_pathway?bmor00604/bmor:100038345%09red/bmor:101745028%09red/bmor:692647%09red
MAPK signaling pathway - fly	KEGG PATHWAY	bmor04013	13	81	0.0643772	0.186529	XP_049876797.1|XP_049884774.1|XP_049877525.1|XP_049876064.1|XP_049871958.1|XP_049868898.1|XP_049874760.1|XP_049887077.1|XP_049886956.1|XP_049879806.1|XP_049884710.1|XP_049871366.1|XP_049875019.1	http://www.genome.jp/kegg-bin/show_pathway?bmor04013/bmor:101741679%09red/bmor:101736712%09red/bmor:692520%09red/bmor:101736734%09red/bmor:101735671%09red/bmor:101746155%09red/bmor:101743155%09red/bmor:101741200%09red/bmor:101743695%09red/bmor:101746370%09red/bmor:101740276%09red/bmor:100862655%09red
Endocytosis	KEGG PATHWAY	bmor04144	17	115	0.0672104	0.189869	XP_049876041.1|XP_049869132.1|XP_049876042.1|XP_049871110.1|XP_049871162.1|XP_049878898.1|XP_049869697.1|XP_049882084.1|XP_049887922.1|XP_049877373.1|XP_049872977.1|XP_049880484.1|XP_049887565.1|XP_049883866.1|XP_049869646.1|XP_049884710.1|XP_049870290.1	http://www.genome.jp/kegg-bin/show_pathway?bmor04144/bmor:101741679%09red/bmor:101747115%09red/bmor:101740542%09red/bmor:101737456%09red/bmor:101739334%09red/bmor:101740629%09red/bmor:101735699%09red/bmor:101740182%09red/bmor:733063%09red/bmor:101745630%09red/bmor:692468%09red/bmor:101742411%09red/bmor:101747093%09red/bmor:101744543%09red/bmor:733093%09red
Other glycan degradation	KEGG PATHWAY	bmor00511	6	29	0.0798793	0.220155	XP_049867209.1|XP_049876908.1|XP_049881967.1|XP_049874194.1|XP_049877247.1|XP_049888140.1	http://www.genome.jp/kegg-bin/show_pathway?bmor00511/bmor:100038345%09red/bmor:101743490%09red/bmor:101745656%09red/bmor:101741392%09red/bmor:692647%09red/bmor:101745028%09red
TGF-beta signaling pathway	KEGG PATHWAY	bmor04350	7	37	0.0848285	0.228229	XP_049866957.1|XP_049868393.1|XP_049882551.1|XP_049868398.1|XP_049876064.1|XP_049871218.1|XP_049868394.1	http://www.genome.jp/kegg-bin/show_pathway?bmor04350/bmor:101742798%09red/bmor:101741200%09red/bmor:101744534%09red/bmor:100037433%09red/bmor:101741860%09red/bmor:100862767%09red
ABC transporters	KEGG PATHWAY	bmor02010	6	30	0.0891311	0.230649	XP_049881483.1|XP_049867954.1|XP_049883671.1|XP_049877251.1|XP_049887665.1|XP_049888074.1	http://www.genome.jp/kegg-bin/show_pathway?bmor02010/bmor:101735553%09red/bmor:101745183%09red/bmor:101739554%09red/bmor:100862790%09red/bmor:101736702%09red/bmor:101741236%09red
Dorso-ventral axis formation	KEGG PATHWAY	bmor04320	5	23	0.0918514	0.230649	XP_049884246.1|XP_049871958.1|XP_049884710.1|XP_049876482.1|XP_049867760.1	http://www.genome.jp/kegg-bin/show_pathway?bmor04320/bmor:101741679%09red/bmor:100125337%09red/bmor:692520%09red/bmor:101735954%09red/bmor:101743312%09red
Autophagy - other	KEGG PATHWAY	bmor04136	5	23	0.0918514	0.230649	XP_049879791.1|XP_049881048.1|XP_049886330.1|XP_049868971.1|XP_049871886.1	http://www.genome.jp/kegg-bin/show_pathway?bmor04136/bmor:101745143%09red/bmor:101740636%09red/bmor:101740431%09red/bmor:101740494%09red/bmor:101743450%09red
Glutathione metabolism	KEGG PATHWAY	bmor00480	9	54	0.0952561	0.233999	XP_049876420.1|XP_049877949.1|XP_049870320.1|XP_049873969.1|XP_049870021.1|XP_049872902.1|XP_049887367.1|XP_049888168.1|XP_049870027.1	http://www.genome.jp/kegg-bin/show_pathway?bmor00480/bmor:101744108%09red/bmor:732996%09red/bmor:692941%09red/bmor:105841246%09red/bmor:100127057%09red/bmor:692543%09red/bmor:692563%09red
beta-Alanine metabolism	KEGG PATHWAY	bmor00410	6	31	0.0989394	0.237876	XP_049873339.1|XP_049867475.1|XP_049871481.1|XP_049866569.1|XP_049868382.1|XP_049873454.1	http://www.genome.jp/kegg-bin/show_pathway?bmor00410/bmor:100329149%09red/bmor:692889%09red/bmor:101744386%09red/bmor:101744675%09red/bmor:101735616%09red/bmor:101740449%09red
AGE-RAGE signaling pathway in diabetic complications	KEGG PATHWAY	bmor04933	6	32	0.109293	0.257293	XP_049866710.1|XP_049883575.1|XP_049866652.1|XP_049871958.1|XP_049868898.1|XP_049866664.1	http://www.genome.jp/kegg-bin/show_pathway?bmor04933/bmor:101736620%09red/bmor:101735646%09red/bmor:101736734%09red/bmor:692520%09red/bmor:101741278%09red/bmor:692625%09red
Glycosphingolipid biosynthesis - globo and isoglobo series	KEGG PATHWAY	bmor00603	3	11	0.116967	0.263649	XP_049874194.1|XP_049876908.1|XP_049877247.1	http://www.genome.jp/kegg-bin/show_pathway?bmor00603/bmor:100038345%09red/bmor:101745028%09red/bmor:692647%09red
Apoptosis - multiple species	KEGG PATHWAY	bmor04215	4	18	0.119733	0.263649	XP_049872376.1|XP_049875840.1|XP_049872371.1|XP_049872549.1	http://www.genome.jp/kegg-bin/show_pathway?bmor04215/bmor:692576%09red/bmor:101738358%09red/bmor:100529085%09red
Fructose and mannose metabolism	KEGG PATHWAY	bmor00051	6	33	0.120176	0.263649	XP_049879140.1|XP_049881379.1|XP_049875386.1|XP_049869183.1|XP_049871493.1|XP_049881390.1	http://www.genome.jp/kegg-bin/show_pathway?bmor00051/bmor:732915%09red/bmor:101743550%09red/bmor:101743996%09red/bmor:101745490%09red/bmor:101736565%09red
Folate biosynthesis	KEGG PATHWAY	bmor00790	7	41	0.121325	0.263649	XP_049865248.1|XP_049875109.1|XP_049865265.1|XP_049865258.1|XP_049873969.1|XP_049869183.1|XP_049865249.1	http://www.genome.jp/kegg-bin/show_pathway?bmor00790/bmor:101743834%09red/bmor:693074%09red/bmor:692941%09red/bmor:101736565%09red/bmor:692396%09red
Biosynthesis of unsaturated fatty acids	KEGG PATHWAY	bmor01040	7	42	0.131534	0.275248	XP_049873339.1|XP_049879548.1|XP_049868594.1|XP_049868603.1|XP_049878478.1|XP_049873454.1|XP_049868626.1	http://www.genome.jp/kegg-bin/show_pathway?bmor01040/bmor:101744618%09red/bmor:692458%09red/bmor:101744675%09red/bmor:101744386%09red/bmor:692568%09red
Cysteine and methionine metabolism	KEGG PATHWAY	bmor00270	7	42	0.131534	0.275248	XP_049865319.1|XP_049876520.1|XP_049887831.1|XP_049868056.1|XP_049865517.1|XP_049873451.1|XP_049865516.1	http://www.genome.jp/kegg-bin/show_pathway?bmor00270/bmor:101736408%09red/bmor:101740191%09red/bmor:101736083%09red/bmor:101736985%09red/bmor:101746766%09red/bmor:101746906%09red/bmor:101741175%09red
N-Glycan biosynthesis	KEGG PATHWAY	bmor00510	6	36	0.155825	0.314432	XP_049870358.1|XP_049875924.1|XP_049871425.1|XP_049887764.1|XP_049869643.1|XP_049877504.1	http://www.genome.jp/kegg-bin/show_pathway?bmor00510/bmor:101735304%09red/bmor:101737095%09red/bmor:101742043%09red/bmor:101744335%09red/bmor:101738885%09red/bmor:101745247%09red
Fatty acid degradation	KEGG PATHWAY	bmor00071	6	36	0.155825	0.314432	XP_049873339.1|XP_049867475.1|XP_049877414.1|XP_049876497.1|XP_049868382.1|XP_049873454.1	http://www.genome.jp/kegg-bin/show_pathway?bmor00071/bmor:101742560%09red/bmor:692889%09red/bmor:101744386%09red/bmor:101744675%09red/bmor:101735616%09red/bmor:105841738%09red
Pantothenate and CoA biosynthesis	KEGG PATHWAY	bmor00770	3	14	0.180679	0.342784	XP_049871481.1|XP_049865319.1|XP_049881307.1	http://www.genome.jp/kegg-bin/show_pathway?bmor00770/bmor:101743809%09red/bmor:101736408%09red/bmor:100329149%09red
Alanine, aspartate and glutamate metabolism	KEGG PATHWAY	bmor00250	6	38	0.181867	0.342784	XP_049871068.1|XP_049866308.1|XP_049887831.1|XP_049866569.1|XP_049866165.1|XP_049867251.1	http://www.genome.jp/kegg-bin/show_pathway?bmor00250/bmor:101735436%09red/bmor:751838%09red/bmor:101741446%09red/bmor:101736083%09red/bmor:101740449%09red/bmor:692939%09red
Selenocompound metabolism	KEGG PATHWAY	bmor00450	2	7	0.182009	0.342784	XP_049866368.1|XP_049866366.1	http://www.genome.jp/kegg-bin/show_pathway?bmor00450/bmor:101745840%09red
Mannose type O-glycan biosynthesis	KEGG PATHWAY	bmor00515	2	7	0.182009	0.342784	XP_049875924.1|XP_049878259.1	http://www.genome.jp/kegg-bin/show_pathway?bmor00515/bmor:101736465%09red/bmor:101738885%09red
Fatty acid metabolism	KEGG PATHWAY	bmor01212	10	74	0.195328	0.361836	XP_049873339.1|XP_049879548.1|XP_049868594.1|XP_049877414.1|XP_049868603.1|XP_049876497.1|XP_049878858.1|XP_049878478.1|XP_049873454.1|XP_049868626.1	http://www.genome.jp/kegg-bin/show_pathway?bmor01212/bmor:101742560%09red/bmor:692458%09red/bmor:692568%09red/bmor:693037%09red/bmor:101744618%09red/bmor:101744386%09red/bmor:101744675%09red/bmor:105841738%09red
Lysine degradation	KEGG PATHWAY	bmor00310	6	40	0.209492	0.37852	XP_049870950.1|XP_049867475.1|XP_049868382.1|XP_049867779.1|XP_049881066.1|XP_049877893.1	http://www.genome.jp/kegg-bin/show_pathway?bmor00310/bmor:101742724%09red/bmor:692889%09red/bmor:101743783%09red/bmor:101740619%09red/bmor:101735616%09red/bmor:101740126%09red
Lysosome	KEGG PATHWAY	bmor04142	15	122	0.214488	0.37852	XP_049874194.1|XP_049880374.1|XP_049885494.1|XP_049875522.1|XP_049876908.1|XP_049878298.1|XP_049869394.1|XP_049888140.1|XP_049875443.1|XP_049877247.1|XP_049872480.1|XP_049867968.1|XP_049865429.1|XP_049879197.1|XP_049880375.1	http://www.genome.jp/kegg-bin/show_pathway?bmor04142/bmor:101741653%09red/bmor:100038345%09red/bmor:101737242%09red/bmor:101745483%09red/bmor:101744899%09red/bmor:692382%09red/bmor:101741211%09red/bmor:101741392%09red/bmor:692647%09red/bmor:101736898%09red/bmor:101745131%09red/bmor:101745028%09red/bmor:101737626%09red/bmor:101742059%09red
Circadian rhythm - fly	KEGG PATHWAY	bmor04711	2	8	0.215026	0.37852	XP_049875131.1|XP_049875133.1	http://www.genome.jp/kegg-bin/show_pathway?bmor04711/bmor:100862751%09red
Tryptophan metabolism	KEGG PATHWAY	bmor00380	5	32	0.217733	0.37852	XP_049882461.1|XP_049870950.1|XP_049867475.1|XP_049868382.1|XP_049877893.1	http://www.genome.jp/kegg-bin/show_pathway?bmor00380/bmor:692889%09red/bmor:101735616%09red/bmor:101740126%09red/bmor:101740619%09red/bmor:101737288%09red
Valine, leucine and isoleucine degradation	KEGG PATHWAY	bmor00280	6	41	0.223826	0.383217	XP_049865319.1|XP_049867475.1|XP_049880847.1|XP_049866569.1|XP_049868382.1|XP_049877414.1	http://www.genome.jp/kegg-bin/show_pathway?bmor00280/bmor:101736408%09red/bmor:692889%09red/bmor:101735616%09red/bmor:692821%09red/bmor:101740449%09red/bmor:105841738%09red
Mitophagy - animal	KEGG PATHWAY	bmor04137	5	33	0.234163	0.394931	XP_049884375.1|XP_049871958.1|XP_049873367.1|XP_049877925.1|XP_049886330.1	http://www.genome.jp/kegg-bin/show_pathway?bmor04137/bmor:101741618%09red/bmor:692520%09red/bmor:101740431%09red/bmor:101741938%09red/bmor:101739525%09red
Ascorbate and aldarate metabolism	KEGG PATHWAY	bmor00053	7	52	0.253477	0.421219	XP_049868359.1|XP_049883129.1|XP_049867475.1|XP_049881023.1|XP_049879160.1|XP_049868382.1|XP_049879151.1	http://www.genome.jp/kegg-bin/show_pathway?bmor00053/bmor:100101177%09red/bmor:100862803%09red/bmor:101745192%09red/bmor:692889%09red/bmor:101740272%09red/bmor:101735616%09red/bmor:100862821%09red
FoxO signaling pathway	KEGG PATHWAY	bmor04068	9	71	0.261782	0.428715	XP_049876322.1|XP_049866710.1|XP_049884375.1|XP_049871958.1|XP_049884286.1|XP_049879945.1|XP_049865419.1|XP_049869363.1|XP_049884710.1	http://www.genome.jp/kegg-bin/show_pathway?bmor04068/bmor:101741679%09red/bmor:692520%09red/bmor:101741938%09red/bmor:733130%09red/bmor:100169708%09red/bmor:101741278%09red/bmor:101739081%09red/bmor:101739346%09red/bmor:101745952%09red
Pentose and glucuronate interconversions	KEGG PATHWAY	bmor00040	8	64	0.290621	0.462537	XP_049883129.1|XP_049870206.1|XP_049885635.1|XP_049865020.1|XP_049881023.1|XP_049869183.1|XP_049868359.1|XP_049870671.1	http://www.genome.jp/kegg-bin/show_pathway?bmor00040/bmor:100862803%09red/bmor:101738077%09red/bmor:101744836%09red/bmor:100862821%09red/bmor:101740272%09red/bmor:101744141%09red/bmor:101736565%09red
Metabolism of xenobiotics by cytochrome P450	KEGG PATHWAY	bmor00980	8	64	0.290621	0.462537	XP_049876420.1|XP_049877949.1|XP_049870206.1|XP_049865020.1|XP_049881023.1|XP_049872902.1|XP_049868359.1|XP_049887367.1	http://www.genome.jp/kegg-bin/show_pathway?bmor00980/bmor:692543%09red/bmor:101744141%09red/bmor:100862803%09red/bmor:100862821%09red/bmor:105841246%09red
Propanoate metabolism	KEGG PATHWAY	bmor00640	4	28	0.303974	0.47707	XP_049873454.1|XP_049884758.1|XP_049866569.1|XP_049873339.1	http://www.genome.jp/kegg-bin/show_pathway?bmor00640/bmor:101746722%09red/bmor:101744386%09red/bmor:101740449%09red/bmor:101744675%09red
Phenylalanine metabolism	KEGG PATHWAY	bmor00360	2	11	0.315617	0.483383	XP_049882461.1|XP_049887831.1	http://www.genome.jp/kegg-bin/show_pathway?bmor00360/bmor:101736083%09red/bmor:101737288%09red
Wnt signaling pathway	KEGG PATHWAY	bmor04310	9	76	0.322633	0.483383	XP_049880737.1|XP_049883300.1|XP_049875131.1|XP_049870471.1|XP_049864949.1|XP_049883343.1|XP_049868898.1|XP_049874760.1|XP_049875133.1	http://www.genome.jp/kegg-bin/show_pathway?bmor04310/bmor:101736734%09red/bmor:101738795%09red/bmor:101745327%09red/bmor:101736219%09red/bmor:100862751%09red/bmor:101736532%09red/bmor:101735671%09red/bmor:101740539%09red
Steroid biosynthesis	KEGG PATHWAY	bmor00100	3	20	0.325107	0.483383	XP_049869394.1|XP_049881861.1|XP_049867968.1	http://www.genome.jp/kegg-bin/show_pathway?bmor00100/bmor:101737242%09red/bmor:101737626%09red/bmor:101738979%09red
Starch and sucrose metabolism	KEGG PATHWAY	bmor00500	3	20	0.325107	0.483383	XP_049876066.1|XP_049885635.1|XP_049877346.1	http://www.genome.jp/kegg-bin/show_pathway?bmor00500/bmor:101744836%09red/bmor:101743212%09red/bmor:101736114%09red
Drug metabolism - cytochrome P450	KEGG PATHWAY	bmor00982	7	58	0.33848	0.496731	XP_049882461.1|XP_049876420.1|XP_049877949.1|XP_049881023.1|XP_049872902.1|XP_049868359.1|XP_049887367.1	http://www.genome.jp/kegg-bin/show_pathway?bmor00982/bmor:692543%09red/bmor:105841246%09red/bmor:100862803%09red/bmor:100862821%09red/bmor:101737288%09red
Ether lipid metabolism	KEGG PATHWAY	bmor00565	4	31	0.365303	0.529221	XP_049877021.1|XP_049887030.1|XP_049877035.1|XP_049877011.1	http://www.genome.jp/kegg-bin/show_pathway?bmor00565/bmor:101745064%09red/bmor:101745213%09red/bmor:101745361%09red/bmor:101736689%09red
Notch signaling pathway	KEGG PATHWAY	bmor04330	3	22	0.374456	0.535614	XP_049880737.1|XP_049887411.1|XP_049883300.1	http://www.genome.jp/kegg-bin/show_pathway?bmor04330/bmor:101736219%09red/bmor:101739888%09red/bmor:101740539%09red
One carbon pool by folate	KEGG PATHWAY	bmor00670	2	13	0.381271	0.538545	XP_049885425.1|XP_049872942.1	http://www.genome.jp/kegg-bin/show_pathway?bmor00670/bmor:101744981%09red/bmor:101744428%09red
Protein processing in endoplasmic reticulum	KEGG PATHWAY	bmor04141	14	132	0.396827	0.553598	XP_049881920.1|XP_049881331.1|XP_049871162.1|XP_049878810.1|XP_049887526.1|XP_049881311.1|XP_049887764.1|XP_049881927.1|XP_049869643.1|XP_049875865.1|XP_049878898.1|XP_049881928.1|XP_049881926.1|XP_049879540.1	http://www.genome.jp/kegg-bin/show_pathway?bmor04141/bmor:101737887%09red/bmor:101739047%09red/bmor:692533%09red/bmor:101737095%09red/bmor:101737590%09red/bmor:101740629%09red/bmor:733093%09red/bmor:101738518%09red/bmor:692487%09red/bmor:101738074%09red/bmor:101744335%09red/bmor:692591%09red/bmor:692488%09red
Butanoate metabolism	KEGG PATHWAY	bmor00650	2	14	0.413099	0.562412	XP_049880847.1|XP_049866569.1	http://www.genome.jp/kegg-bin/show_pathway?bmor00650/bmor:692821%09red/bmor:101740449%09red
Nicotinate and nicotinamide metabolism	KEGG PATHWAY	bmor00760	2	14	0.413099	0.562412	XP_049872302.1|XP_049879931.1	http://www.genome.jp/kegg-bin/show_pathway?bmor00760/bmor:101741806%09red/bmor:101744387%09red
Glycosphingolipid biosynthesis - lacto and neolacto series	KEGG PATHWAY	bmor00601	1	5	0.42185	0.567489	XP_049875924.1	http://www.genome.jp/kegg-bin/show_pathway?bmor00601/bmor:101738885%09red
Fatty acid biosynthesis	KEGG PATHWAY	bmor00061	2	15	0.444089	0.590377	XP_049876497.1|XP_049878858.1	http://www.genome.jp/kegg-bin/show_pathway?bmor00061/bmor:101742560%09red/bmor:693037%09red
D-Glutamine and D-glutamate metabolism	KEGG PATHWAY	bmor00471	1	6	0.472319	0.620605	XP_049871068.1	http://www.genome.jp/kegg-bin/show_pathway?bmor00471/bmor:692939%09red
Neuroactive ligand-receptor interaction	KEGG PATHWAY	bmor04080	7	68	0.484547	0.623799	XP_049880027.1|XP_049880364.1|XP_049881938.1|XP_049876641.1|XP_049877285.1|XP_049887183.1|XP_049870225.1	http://www.genome.jp/kegg-bin/show_pathway?bmor04080/bmor:100174926%09red/bmor:101735316%09red/bmor:692603%09red/bmor:101739308%09red/bmor:100187564%09red/bmor:101735335%09red
Pyrimidine metabolism	KEGG PATHWAY	bmor00240	4	37	0.48579	0.623799	XP_049871481.1|XP_049872302.1|XP_049867971.1|XP_049879931.1	http://www.genome.jp/kegg-bin/show_pathway?bmor00240/bmor:101741806%09red/bmor:100329149%09red/bmor:101736970%09red/bmor:101744387%09red
Peroxisome	KEGG PATHWAY	bmor04146	11	112	0.512299	0.647437	XP_049873339.1|XP_049881483.1|XP_049877604.1|XP_049887078.1|XP_049880847.1|XP_049866860.1|XP_049876497.1|XP_049873454.1|XP_049873405.1|XP_049875015.1|XP_049882997.1	http://www.genome.jp/kegg-bin/show_pathway?bmor04146/bmor:101742560%09red/bmor:105841608%09red/bmor:101742196%09red/bmor:101739774%09red/bmor:101735553%09red/bmor:101735660%09red/bmor:692772%09red/bmor:101744386%09red/bmor:101744675%09red/bmor:692821%09red/bmor:101739179%09red
Phototransduction - fly	KEGG PATHWAY	bmor04745	3	28	0.515658	0.647437	XP_049865518.1|XP_049873884.1|XP_049873365.1	http://www.genome.jp/kegg-bin/show_pathway?bmor04745/bmor:100145914%09red/bmor:101738501%09red/bmor:101742981%09red
Arachidonic acid metabolism	KEGG PATHWAY	bmor00590	3	31	0.579592	0.719713	XP_049870413.1|XP_049876420.1|XP_049877949.1	http://www.genome.jp/kegg-bin/show_pathway?bmor00590/bmor:101743283%09red/bmor:692543%09red
SNARE interactions in vesicular transport	KEGG PATHWAY	bmor04130	2	21	0.60847	0.74736	XP_049865405.1|XP_049880145.1	http://www.genome.jp/kegg-bin/show_pathway?bmor04130/bmor:733071%09red/bmor:101742448%09red
Drug metabolism - other enzymes	KEGG PATHWAY	bmor00983	8	93	0.664629	0.795316	XP_049873696.1|XP_049867971.1|XP_049881023.1|XP_049872902.1|XP_049868359.1|XP_049871481.1|XP_049887367.1|XP_049875015.1	http://www.genome.jp/kegg-bin/show_pathway?bmor00983/bmor:100329149%09red/bmor:100862803%09red/bmor:105841246%09red/bmor:100500761%09red/bmor:101739179%09red/bmor:101736970%09red/bmor:100862821%09red
Mucin type O-glycan biosynthesis	KEGG PATHWAY	bmor00512	1	11	0.665813	0.795316	XP_049882424.1	http://www.genome.jp/kegg-bin/show_pathway?bmor00512/bmor:101736888%09red
alpha-Linolenic acid metabolism	KEGG PATHWAY	bmor00592	2	24	0.675667	0.795316	XP_049873454.1|XP_049873339.1	http://www.genome.jp/kegg-bin/show_pathway?bmor00592/bmor:101744386%09red/bmor:101744675%09red
Fatty acid elongation	KEGG PATHWAY	bmor00062	2	24	0.675667	0.795316	XP_049877414.1|XP_049879548.1	http://www.genome.jp/kegg-bin/show_pathway?bmor00062/bmor:101744618%09red/bmor:105841738%09red
Caffeine metabolism	KEGG PATHWAY	bmor00232	1	12	0.694996	0.806394	XP_049875015.1	http://www.genome.jp/kegg-bin/show_pathway?bmor00232/bmor:101739179%09red
Proteasome	KEGG PATHWAY	bmor03050	3	38	0.706487	0.806394	XP_049866837.1|XP_049877713.1|XP_049880367.1	http://www.genome.jp/kegg-bin/show_pathway?bmor03050/bmor:101745357%09red/bmor:692896%09red/bmor:101742315%09red
Toll and Imd signaling pathway	KEGG PATHWAY	bmor04624	3	38	0.706487	0.806394	XP_049883343.1|XP_049876602.1|XP_049877525.1	http://www.genome.jp/kegg-bin/show_pathway?bmor04624/bmor:101743155%09red/bmor:101738795%09red/bmor:101737520%09red
Other types of O-glycan biosynthesis	KEGG PATHWAY	bmor00514	1	13	0.721632	0.815444	XP_049875924.1	http://www.genome.jp/kegg-bin/show_pathway?bmor00514/bmor:101738885%09red
Glycosaminoglycan biosynthesis - heparan sulfate / heparin	KEGG PATHWAY	bmor00534	1	15	0.768133	0.859397	XP_049872441.1	http://www.genome.jp/kegg-bin/show_pathway?bmor00534/bmor:101741346%09red
Linoleic acid metabolism	KEGG PATHWAY	bmor00591	1	17	0.806871	0.885208	XP_049870413.1	http://www.genome.jp/kegg-bin/show_pathway?bmor00591/bmor:101743283%09red
Hippo signaling pathway - multiple species	KEGG PATHWAY	bmor04392	1	17	0.806871	0.885208	XP_049868233.1	http://www.genome.jp/kegg-bin/show_pathway?bmor04392/bmor:101746256%09red
Retinol metabolism	KEGG PATHWAY	bmor00830	3	47	0.82375	0.895036	XP_049879560.1|XP_049868359.1|XP_049881023.1	http://www.genome.jp/kegg-bin/show_pathway?bmor00830/bmor:101735502%09red/bmor:100862803%09red/bmor:100862821%09red
Tyrosine metabolism	KEGG PATHWAY	bmor00350	2	34	0.834341	0.89791	XP_049882461.1|XP_049887831.1	http://www.genome.jp/kegg-bin/show_pathway?bmor00350/bmor:101736083%09red/bmor:101737288%09red
RNA degradation	KEGG PATHWAY	bmor03018	4	65	0.86316	0.920161	XP_049879971.1|XP_049881379.1|XP_049881390.1|XP_049885931.1	http://www.genome.jp/kegg-bin/show_pathway?bmor03018/bmor:101745490%09red/bmor:101740847%09red/bmor:101738940%09red
Porphyrin and chlorophyll metabolism	KEGG PATHWAY	bmor00860	3	56	0.898478	0.94886	XP_049869845.1|XP_049868359.1|XP_049881023.1	http://www.genome.jp/kegg-bin/show_pathway?bmor00860/bmor:100862803%09red/bmor:101738292%09red/bmor:100862821%09red
Terpenoid backbone biosynthesis	KEGG PATHWAY	bmor00900	1	28	0.929366	0.972392	XP_049882584.1	http://www.genome.jp/kegg-bin/show_pathway?bmor00900/bmor:100101204%09red
mRNA surveillance pathway	KEGG PATHWAY	bmor03015	2	64	0.982503	0.999991	XP_049882188.1|XP_049883388.1	http://www.genome.jp/kegg-bin/show_pathway?bmor03015/bmor:101737911%09red/bmor:101740532%09red
RNA transport	KEGG PATHWAY	bmor03013	5	122	0.988805	0.999991	XP_049884427.1|XP_049866466.1|XP_049884891.1|XP_049865593.1|XP_049875986.1	http://www.genome.jp/kegg-bin/show_pathway?bmor03013/bmor:101735791%09red/bmor:101746229%09red/bmor:101736050%09red/bmor:732913%09red/bmor:101742358%09red
Ribosome biogenesis in eukaryotes	KEGG PATHWAY	bmor03008	1	69	0.998348	0.999991	XP_049874105.1	http://www.genome.jp/kegg-bin/show_pathway?bmor03008/bmor:101742367%09red
Spliceosome	KEGG PATHWAY	bmor03040	3	120	0.998953	0.999991	XP_049871162.1|XP_049878898.1|XP_049883186.1	http://www.genome.jp/kegg-bin/show_pathway?bmor03040/bmor:101740629%09red/bmor:101739300%09red/bmor:733093%09red
Ribosome	KEGG PATHWAY	bmor03010	1	126	0.999991	0.999991	XP_049881110.1	http://www.genome.jp/kegg-bin/show_pathway?bmor03010/bmor:692653%09red
--------------------
#Term	Database	ID	Input number	Background number	P-Value	Corrected P-Value	Input	Hyperlink
--------------------
#Term	Database	ID	Input number	Background number	P-Value	Corrected P-Value	Input	Hyperlink
--------------------

## Sheet: KEGG_nPBW-BtR vs. sPBW-BtR_up
##Databases: KEGG PATHWAY
##Statistical test method: hypergeometric test / Fisher's exact test
##FDR correction method: Benjamini and Hochberg
#Term	Database	ID	Input number	Background number	P-Value	Corrected P-Value	Input	Hyperlink
Ribosome biogenesis in eukaryotes	KEGG PATHWAY	bmor03008	31	69	4.84402e-14	4.16586e-12	XP_049874071.1|XP_049872696.1|XP_049878626.1|XP_049874029.1|XP_049874578.1|XP_049869443.1|XP_049882315.1|XP_049873842.1|XP_049883349.1|XP_049874322.1|XP_049886023.1|XP_049888009.1|XP_049878285.1|XP_049872094.1|XP_049883520.1|XP_049880904.1|XP_049871276.1|XP_049881827.1|XP_049871212.1|XP_049874737.1|XP_049882191.1|XP_049869955.1|XP_049874361.1|XP_049867935.1|XP_049887460.1|XP_049882648.1|XP_049871…	http://www.genome.jp/kegg-bin/show_pathway?bmor03008/bmor:100862801%09red/bmor:101735934%09red/bmor:101739847%09red/bmor:101737534%09red/bmor:101746403%09red/bmor:101735526%09red/bmor:101737448%09red/bmor:101745253%09red/bmor:732976%09red/bmor:101742458%09red/bmor:101735989%09red/bmor:101744752%09red/bmor:101745565%09red/bmor:101744824%09red/bmor:101742289%09red/bmor:692972%09red/bmor:101746348%0…
RNA polymerase	KEGG PATHWAY	bmor03020	10	29	0.000120233	0.00517001	XP_049874411.1|XP_049869441.1|XP_049871134.1|XP_049877701.1|XP_049865546.1|XP_049879620.1|XP_049883543.1|XP_049884289.1|XP_049873584.1|XP_049878714.1	http://www.genome.jp/kegg-bin/show_pathway?bmor03020/bmor:101740659%09red/bmor:100379192%09red/bmor:101745151%09red/bmor:101737098%09red/bmor:101743619%09red/bmor:693115%09red/bmor:101745139%09red/bmor:101741060%09red/bmor:101744943%09red/bmor:101744611%09red
Caffeine metabolism	KEGG PATHWAY	bmor00232	5	12	0.00334073	0.0957676	XP_049875311.1|XP_049874983.1|XP_049874984.1|XP_049867765.1|XP_049875312.1	http://www.genome.jp/kegg-bin/show_pathway?bmor00232/bmor:100126537%09red/bmor:101741112%09red/bmor:101738607%09red/bmor:692757%09red
Spliceosome	KEGG PATHWAY	bmor03040	16	120	0.0125659	0.270166	XP_049881486.1|XP_049866663.1|XP_049874717.1|XP_049865964.1|XP_049879746.1|XP_049868467.1|XP_049874361.1|XP_049873314.1|XP_049881352.1|XP_049874930.1|XP_049874405.1|XP_049880928.1|XP_049874517.1|XP_049887642.1|XP_049875779.1|XP_049873823.1	http://www.genome.jp/kegg-bin/show_pathway?bmor03040/bmor:733079%09red/bmor:732955%09red/bmor:101738508%09red/bmor:101737609%09red/bmor:101742693%09red/bmor:101745281%09red/bmor:101736496%09red/bmor:101740068%09red/bmor:101741443%09red/bmor:732985%09red/bmor:100036587%09red/bmor:732932%09red/bmor:692822%09red/bmor:101741170%09red/bmor:100033384%09red/bmor:692972%09red
Non-homologous end-joining	KEGG PATHWAY	bmor03450	3	8	0.0287549	0.494583	XP_049880386.1|XP_049888135.1|XP_049877459.1	http://www.genome.jp/kegg-bin/show_pathway?bmor03450/bmor:101745535%09red/bmor:692385%09red/bmor:101741812%09red
Other types of O-glycan biosynthesis	KEGG PATHWAY	bmor00514	3	13	0.0771577	0.999997	XP_049886201.1|XP_049887250.1|XP_049865990.1	http://www.genome.jp/kegg-bin/show_pathway?bmor00514/bmor:101746748%09red/bmor:101740832%09red/bmor:692614%09red
DNA replication	KEGG PATHWAY	bmor03030	5	36	0.116562	0.999997	XP_049864982.1|XP_049887428.1|XP_049880386.1|XP_049876576.1|XP_049884421.1	http://www.genome.jp/kegg-bin/show_pathway?bmor03030/bmor:101741812%09red/bmor:101743300%09red/bmor:101736794%09red/bmor:732919%09red/bmor:101746848%09red
Aminoacyl-tRNA biosynthesis	KEGG PATHWAY	bmor00970	5	40	0.15545	0.999997	XP_049873332.1|XP_049869123.1|XP_049879516.1|XP_049865257.1|XP_049876324.1	http://www.genome.jp/kegg-bin/show_pathway?bmor00970/bmor:101737306%09red/bmor:101743331%09red/bmor:101737924%09red/bmor:101746251%09red
Ribosome	KEGG PATHWAY	bmor03010	12	126	0.167687	0.999997	XP_049879171.1|XP_049880890.1|XP_049871736.1|XP_049874866.1|XP_049886492.1|XP_049877494.1|XP_049869600.1|XP_049879202.1|XP_049869442.1|XP_049877670.1|XP_049871043.1|XP_049876428.1	http://www.genome.jp/kegg-bin/show_pathway?bmor03010/bmor:101739135%09red/bmor:101736359%09red/bmor:101745044%09red/bmor:101741005%09red/bmor:101739965%09red/bmor:100101172%09red/bmor:101744946%09red/bmor:692706%09red/bmor:101742782%09red/bmor:101736605%09red/bmor:101746284%09red/bmor:101746056%09red
Ubiquinone and other terpenoid-quinone biosynthesis	KEGG PATHWAY	bmor00130	2	10	0.174861	0.999997	XP_049869979.1|XP_049873056.1	http://www.genome.jp/kegg-bin/show_pathway?bmor00130/bmor:101746796%09red/bmor:101742749%09red
Phenylalanine metabolism	KEGG PATHWAY	bmor00360	2	11	0.198409	0.999997	XP_049869979.1|XP_049873056.1	http://www.genome.jp/kegg-bin/show_pathway?bmor00360/bmor:101746796%09red/bmor:101742749%09red
RNA transport	KEGG PATHWAY	bmor03013	11	122	0.22515	0.999997	XP_049873942.1|XP_049870665.1|XP_049870807.1|XP_049886023.1|XP_049876160.1|XP_049873811.1|XP_049872609.1|XP_049865962.1|XP_049870017.1|XP_049879587.1|XP_049887187.1	http://www.genome.jp/kegg-bin/show_pathway?bmor03013/bmor:733081%09red/bmor:732971%09red/bmor:693102%09red/bmor:101736857%09red/bmor:101742218%09red/bmor:101743750%09red/bmor:692986%09red/bmor:101742253%09red/bmor:101745001%09red/bmor:101735721%09red/bmor:692781%09red
TGF-beta signaling pathway	KEGG PATHWAY	bmor04350	4	37	0.262243	0.999997	XP_049876743.1|XP_049868690.1|XP_049883951.1|XP_049867175.1	http://www.genome.jp/kegg-bin/show_pathway?bmor04350/bmor:101744944%09red/bmor:101739275%09red/bmor:100174852%09red/bmor:101742424%09red
Toll and Imd signaling pathway	KEGG PATHWAY	bmor04624	4	38	0.276604	0.999997	XP_049876812.1|XP_049869815.1|XP_049874553.1|XP_049872293.1	http://www.genome.jp/kegg-bin/show_pathway?bmor04624/bmor:101744654%09red/bmor:101738751%09red/bmor:100136938%09red
Arginine and proline metabolism	KEGG PATHWAY	bmor00330	3	27	0.297162	0.999997	XP_049887581.1|XP_049872921.1|XP_049884612.1	http://www.genome.jp/kegg-bin/show_pathway?bmor00330/bmor:101741966%09red/bmor:100141459%09red
Drug metabolism - other enzymes	KEGG PATHWAY	bmor00983	8	93	0.312395	0.999997	XP_049875311.1|XP_049869120.1|XP_049874983.1|XP_049875312.1|XP_049873577.1|XP_049867765.1|XP_049874984.1|XP_049885624.1	http://www.genome.jp/kegg-bin/show_pathway?bmor00983/bmor:100862830%09red/bmor:100126537%09red/bmor:101741112%09red/bmor:101738607%09red/bmor:692593%09red/bmor:692850%09red/bmor:692757%09red
Folate biosynthesis	KEGG PATHWAY	bmor00790	4	41	0.320326	0.999997	XP_049879147.1|XP_049874895.1|XP_049882966.1|XP_049886282.1	http://www.genome.jp/kegg-bin/show_pathway?bmor00790/bmor:101743035%09red/bmor:101746802%09red/bmor:100270767%09red/bmor:692791%09red
Vitamin B6 metabolism	KEGG PATHWAY	bmor00750	1	5	0.325717	0.999997	XP_049883494.1	http://www.genome.jp/kegg-bin/show_pathway?bmor00750/bmor:101745817%09red
Lysosome	KEGG PATHWAY	bmor04142	10	122	0.329796	0.999997	XP_049877707.1|XP_049878911.1|XP_049865441.1|XP_049873010.1|XP_049887312.1|XP_049870863.1|XP_049873016.1|XP_049878812.1|XP_049878920.1|XP_049868834.1	http://www.genome.jp/kegg-bin/show_pathway?bmor04142/bmor:101741653%09red/bmor:101740545%09red/bmor:692921%09red/bmor:692390%09red/bmor:101742640%09red/bmor:101739720%09red/bmor:732993%09red/bmor:101737579%09red/bmor:101736893%09red
Homologous recombination	KEGG PATHWAY	bmor03440	3	30	0.350517	0.999997	XP_049864982.1|XP_049872456.1|XP_049888135.1	http://www.genome.jp/kegg-bin/show_pathway?bmor03440/bmor:732919%09red/bmor:692385%09red/bmor:101735303%09red
Peroxisome	KEGG PATHWAY	bmor04146	9	112	0.362749	0.999997	XP_049875311.1|XP_049867703.1|XP_049874984.1|XP_049866565.1|XP_049874983.1|XP_049866442.1|XP_049872915.1|XP_049867765.1|XP_049875312.1	http://www.genome.jp/kegg-bin/show_pathway?bmor04146/bmor:100126537%09red/bmor:101741112%09red/bmor:101738607%09red/bmor:101743280%09red/bmor:101738565%09red/bmor:101737781%09red/bmor:101739612%09red/bmor:692757%09red
Mitophagy - animal	KEGG PATHWAY	bmor04137	3	33	0.403392	0.999997	XP_049881814.1|XP_049881833.1|XP_049867655.1	http://www.genome.jp/kegg-bin/show_pathway?bmor04137/bmor:101746359%09red/bmor:101736581%09red/bmor:101736823%09red
Sulfur relay system	KEGG PATHWAY	bmor04122	1	7	0.408745	0.999997	XP_049884156.1	http://www.genome.jp/kegg-bin/show_pathway?bmor04122/bmor:101737191%09red
Tyrosine metabolism	KEGG PATHWAY	bmor00350	3	34	0.420761	0.999997	XP_049869979.1|XP_049873056.1|XP_049886282.1	http://www.genome.jp/kegg-bin/show_pathway?bmor00350/bmor:100270767%09red/bmor:101746796%09red/bmor:101742749%09red
Base excision repair	KEGG PATHWAY	bmor03410	2	21	0.434586	0.999997	XP_049879687.1|XP_049880386.1	http://www.genome.jp/kegg-bin/show_pathway?bmor03410/bmor:101741017%09red/bmor:101741812%09red
SNARE interactions in vesicular transport	KEGG PATHWAY	bmor04130	2	21	0.434586	0.999997	XP_049876192.1|XP_049871504.1	http://www.genome.jp/kegg-bin/show_pathway?bmor04130/bmor:101737678%09red/bmor:101735547%09red
Pentose and glucuronate interconversions	KEGG PATHWAY	bmor00040	5	64	0.448654	0.999997	XP_049873577.1|XP_049879147.1|XP_049885624.1|XP_049882966.1|XP_049877479.1	http://www.genome.jp/kegg-bin/show_pathway?bmor00040/bmor:101743035%09red/bmor:101746802%09red/bmor:100862830%09red/bmor:101746883%09red/bmor:692593%09red
mRNA surveillance pathway	KEGG PATHWAY	bmor03015	5	64	0.448654	0.999997	XP_049874064.1|XP_049873811.1|XP_049887107.1|XP_049879587.1|XP_049886023.1	http://www.genome.jp/kegg-bin/show_pathway?bmor03015/bmor:693102%09red/bmor:733099%09red/bmor:101739716%09red/bmor:101736857%09red/bmor:692986%09red
Amino sugar and nucleotide sugar metabolism	KEGG PATHWAY	bmor00520	4	50	0.45193	0.999997	XP_049865799.1|XP_049877482.1|XP_049882724.1|XP_049867133.1	http://www.genome.jp/kegg-bin/show_pathway?bmor00520/bmor:101744821%09red/bmor:101736959%09red/bmor:692403%09red/bmor:101740590%09red
RNA degradation	KEGG PATHWAY	bmor03018	5	65	0.46124	0.999997	XP_049884807.1|XP_049867000.1|XP_049887594.1|XP_049875779.1|XP_049864956.1	http://www.genome.jp/kegg-bin/show_pathway?bmor03018/bmor:101738613%09red/bmor:101744020%09red/bmor:101745492%09red/bmor:732955%09red/bmor:101737211%09red
Sulfur metabolism	KEGG PATHWAY	bmor00920	1	9	0.481558	0.999997	XP_049874768.1	http://www.genome.jp/kegg-bin/show_pathway?bmor00920/bmor:101745635%09red
Glycerolipid metabolism	KEGG PATHWAY	bmor00561	4	53	0.494234	0.999997	XP_049887681.1|XP_049879147.1|XP_049882966.1|XP_049877479.1	http://www.genome.jp/kegg-bin/show_pathway?bmor00561/bmor:101743035%09red/bmor:101746802%09red/bmor:101737501%09red/bmor:101746883%09red
Fatty acid elongation	KEGG PATHWAY	bmor00062	2	24	0.49885	0.999997	XP_049865801.1|XP_049876236.1	http://www.genome.jp/kegg-bin/show_pathway?bmor00062/bmor:101735457%09red/bmor:101737655%09red
Pentose phosphate pathway	KEGG PATHWAY	bmor00030	2	26	0.539007	0.999997	XP_049879212.1|XP_049884815.1	http://www.genome.jp/kegg-bin/show_pathway?bmor00030/bmor:101745880%09red/bmor:101739464%09red
Hippo signaling pathway - fly	KEGG PATHWAY	bmor04391	4	57	0.548347	0.999997	XP_049888242.1|XP_049872523.1|XP_049883210.1|XP_049881336.1	http://www.genome.jp/kegg-bin/show_pathway?bmor04391/bmor:101743219%09red/bmor:100145913%09red/bmor:101743831%09red/bmor:692948%09red
Terpenoid backbone biosynthesis	KEGG PATHWAY	bmor00900	2	28	0.576882	0.999997	XP_049879636.1|XP_049878184.1	http://www.genome.jp/kegg-bin/show_pathway?bmor00900/bmor:101741066%09red/bmor:101736885%09red
Galactose metabolism	KEGG PATHWAY	bmor00052	2	28	0.576882	0.999997	XP_049879147.1|XP_049882966.1	http://www.genome.jp/kegg-bin/show_pathway?bmor00052/bmor:101743035%09red/bmor:101746802%09red
Other glycan degradation	KEGG PATHWAY	bmor00511	2	29	0.594947	0.999997	XP_049878920.1|XP_049878911.1	http://www.genome.jp/kegg-bin/show_pathway?bmor00511/bmor:101742640%09red
One carbon pool by folate	KEGG PATHWAY	bmor00670	1	13	0.601408	0.999997	XP_049874948.1	http://www.genome.jp/kegg-bin/show_pathway?bmor00670/bmor:101735471%09red
Purine metabolism	KEGG PATHWAY	bmor00230	7	109	0.611355	0.999997	XP_049875311.1|XP_049874983.1|XP_049879501.1|XP_049875312.1|XP_049867765.1|XP_049874984.1|XP_049883520.1	http://www.genome.jp/kegg-bin/show_pathway?bmor00230/bmor:100126537%09red/bmor:101741112%09red/bmor:100125606%09red/bmor:101735934%09red/bmor:101738607%09red/bmor:692757%09red
Phagosome	KEGG PATHWAY	bmor04145	5	78	0.613972	0.999997	XP_049878341.1|XP_049869751.1|XP_049871504.1|XP_049881336.1|XP_049870841.1	http://www.genome.jp/kegg-bin/show_pathway?bmor04145/bmor:101737678%09red/bmor:100313947%09red/bmor:100145913%09red/bmor:101739651%09red/bmor:692429%09red
MAPK signaling pathway - fly	KEGG PATHWAY	bmor04013	5	81	0.64544	0.999997	XP_049888242.1|XP_049877952.1|XP_049870841.1|XP_049875757.1|XP_049887393.1	http://www.genome.jp/kegg-bin/show_pathway?bmor04013/bmor:101740816%09red/bmor:101747006%09red/bmor:100302610%09red/bmor:101743831%09red/bmor:101739651%09red
Fanconi anemia pathway	KEGG PATHWAY	bmor03460	2	32	0.645642	0.999997	XP_049872456.1|XP_049873088.1	http://www.genome.jp/kegg-bin/show_pathway?bmor03460/bmor:101735303%09red/bmor:101747068%09red
Insect hormone biosynthesis	KEGG PATHWAY	bmor00981	2	32	0.645642	0.999997	XP_049879636.1|XP_049873126.1	http://www.genome.jp/kegg-bin/show_pathway?bmor00981/bmor:101741066%09red/bmor:100127120%09red
Fatty acid biosynthesis	KEGG PATHWAY	bmor00061	1	15	0.650513	0.999997	XP_049876236.1	http://www.genome.jp/kegg-bin/show_pathway?bmor00061/bmor:101737655%09red
Fructose and mannose metabolism	KEGG PATHWAY	bmor00051	2	33	0.661386	0.999997	XP_049879147.1|XP_049882966.1	http://www.genome.jp/kegg-bin/show_pathway?bmor00051/bmor:101743035%09red/bmor:101746802%09red
Sphingolipid metabolism	KEGG PATHWAY	bmor00600	2	34	0.676562	0.999997	XP_049878920.1|XP_049878911.1	http://www.genome.jp/kegg-bin/show_pathway?bmor00600/bmor:101742640%09red
Ascorbate and aldarate metabolism	KEGG PATHWAY	bmor00053	3	52	0.687976	0.999997	XP_049873577.1|XP_049885624.1|XP_049884815.1	http://www.genome.jp/kegg-bin/show_pathway?bmor00053/bmor:100862830%09red/bmor:692593%09red/bmor:101745880%09red
Glutathione metabolism	KEGG PATHWAY	bmor00480	3	54	0.711149	0.999997	XP_049872921.1|XP_049886183.1|XP_049884612.1	http://www.genome.jp/kegg-bin/show_pathway?bmor00480/bmor:101738946%09red/bmor:100141459%09red
Apoptosis - multiple species	KEGG PATHWAY	bmor04215	1	18	0.713073	0.999997	XP_049888242.1	http://www.genome.jp/kegg-bin/show_pathway?bmor04215/bmor:101743831%09red
Nitrogen metabolism	KEGG PATHWAY	bmor00910	1	18	0.713073	0.999997	XP_049870215.1	http://www.genome.jp/kegg-bin/show_pathway?bmor00910/bmor:101738069%09red
Glycerophospholipid metabolism	KEGG PATHWAY	bmor00564	4	72	0.720071	0.999997	XP_049878324.1|XP_049865022.1|XP_049877473.1|XP_049887681.1	http://www.genome.jp/kegg-bin/show_pathway?bmor00564/bmor:101735985%09red/bmor:101737501%09red/bmor:101745087%09red/bmor:101740604%09red
Alanine, aspartate and glutamate metabolism	KEGG PATHWAY	bmor00250	2	38	0.731779	0.999997	XP_049887581.1|XP_049872481.1	http://www.genome.jp/kegg-bin/show_pathway?bmor00250/bmor:692995%09red/bmor:101741966%09red
Longevity regulating pathway - multiple species	KEGG PATHWAY	bmor04213	4	75	0.747884	0.999997	XP_049881486.1|XP_049881543.1|XP_049883290.1|XP_049867175.1	http://www.genome.jp/kegg-bin/show_pathway?bmor04213/bmor:692822%09red/bmor:101743710%09red/bmor:100174852%09red/bmor:101742383%09red
Glycosylphosphatidylinositol (GPI)-anchor biosynthesis	KEGG PATHWAY	bmor00563	1	20	0.748431	0.999997	XP_049868805.1	http://www.genome.jp/kegg-bin/show_pathway?bmor00563/bmor:101746707%09red
Mismatch repair	KEGG PATHWAY	bmor03430	1	20	0.748431	0.999997	XP_049864982.1	http://www.genome.jp/kegg-bin/show_pathway?bmor03430/bmor:732919%09red
Wnt signaling pathway	KEGG PATHWAY	bmor04310	4	76	0.756672	0.999997	XP_049871539.1|XP_049878273.1|XP_049883951.1|XP_049870841.1	http://www.genome.jp/kegg-bin/show_pathway?bmor04310/bmor:101744944%09red/bmor:101741216%09red/bmor:101739651%09red/bmor:101745218%09red
Cysteine and methionine metabolism	KEGG PATHWAY	bmor00270	2	42	0.778772	0.999997	XP_049869979.1|XP_049874768.1	http://www.genome.jp/kegg-bin/show_pathway?bmor00270/bmor:101745635%09red/bmor:101742749%09red
Notch signaling pathway	KEGG PATHWAY	bmor04330	1	22	0.779436	0.999997	XP_049883951.1	http://www.genome.jp/kegg-bin/show_pathway?bmor04330/bmor:101744944%09red
Protein export	KEGG PATHWAY	bmor03060	1	23	0.793476	0.999997	XP_049873393.1	http://www.genome.jp/kegg-bin/show_pathway?bmor03060/bmor:778523%09red
Retinol metabolism	KEGG PATHWAY	bmor00830	2	47	0.827247	0.999997	XP_049873577.1|XP_049885624.1	http://www.genome.jp/kegg-bin/show_pathway?bmor00830/bmor:100862830%09red/bmor:692593%09red
ECM-receptor interaction	KEGG PATHWAY	bmor04512	1	27	0.841257	0.999997	XP_049878341.1	http://www.genome.jp/kegg-bin/show_pathway?bmor04512/bmor:100313947%09red
Phototransduction - fly	KEGG PATHWAY	bmor04745	1	28	0.851365	0.999997	XP_049881336.1	http://www.genome.jp/kegg-bin/show_pathway?bmor04745/bmor:100145913%09red
Apoptosis - fly	KEGG PATHWAY	bmor04214	2	50	0.851529	0.999997	XP_049888242.1|XP_049867655.1	http://www.genome.jp/kegg-bin/show_pathway?bmor04214/bmor:101746359%09red/bmor:101743831%09red
Biosynthesis of amino acids	KEGG PATHWAY	bmor01230	3	75	0.880611	0.999997	XP_049869979.1|XP_049874768.1|XP_049872481.1	http://www.genome.jp/kegg-bin/show_pathway?bmor01230/bmor:692995%09red/bmor:101745635%09red/bmor:101742749%09red
AGE-RAGE signaling pathway in diabetic complications	KEGG PATHWAY	bmor04933	1	32	0.885762	0.999997	XP_049870841.1	http://www.genome.jp/kegg-bin/show_pathway?bmor04933/bmor:101739651%09red
Porphyrin and chlorophyll metabolism	KEGG PATHWAY	bmor00860	2	56	0.89099	0.999997	XP_049873577.1|XP_049885624.1	http://www.genome.jp/kegg-bin/show_pathway?bmor00860/bmor:100862830%09red/bmor:692593%09red
Basal transcription factors	KEGG PATHWAY	bmor03022	1	34	0.899852	0.999997	XP_049877715.1	http://www.genome.jp/kegg-bin/show_pathway?bmor03022/bmor:733002%09red
Drug metabolism - cytochrome P450	KEGG PATHWAY	bmor00982	2	58	0.901816	0.999997	XP_049873577.1|XP_049885624.1	http://www.genome.jp/kegg-bin/show_pathway?bmor00982/bmor:100862830%09red/bmor:692593%09red
N-Glycan biosynthesis	KEGG PATHWAY	bmor00510	1	36	0.912206	0.999997	XP_049887414.1	http://www.genome.jp/kegg-bin/show_pathway?bmor00510/bmor:101741427%09red
Pyrimidine metabolism	KEGG PATHWAY	bmor00240	1	37	0.917799	0.999997	XP_049869120.1	http://www.genome.jp/kegg-bin/show_pathway?bmor00240/bmor:692850%09red
Metabolism of xenobiotics by cytochrome P450	KEGG PATHWAY	bmor00980	2	64	0.928563	0.999997	XP_049873577.1|XP_049885624.1	http://www.genome.jp/kegg-bin/show_pathway?bmor00980/bmor:100862830%09red/bmor:692593%09red
Lysine degradation	KEGG PATHWAY	bmor00310	1	40	0.932532	0.999997	XP_049875121.1	http://www.genome.jp/kegg-bin/show_pathway?bmor00310/bmor:101740875%09red
Biosynthesis of unsaturated fatty acids	KEGG PATHWAY	bmor01040	1	42	0.940858	0.999997	XP_049865801.1	http://www.genome.jp/kegg-bin/show_pathway?bmor01040/bmor:101735457%09red
Protein processing in endoplasmic reticulum	KEGG PATHWAY	bmor04141	5	132	0.941059	0.999997	XP_049881486.1|XP_049881543.1|XP_049886754.1|XP_049883290.1|XP_049870583.1	http://www.genome.jp/kegg-bin/show_pathway?bmor04141/bmor:692822%09red/bmor:101743710%09red/bmor:733039%09red/bmor:101746261%09red/bmor:101742383%09red
Neuroactive ligand-receptor interaction	KEGG PATHWAY	bmor04080	2	68	0.942396	0.999997	XP_049873031.1|XP_049880360.1	http://www.genome.jp/kegg-bin/show_pathway?bmor04080/bmor:101735694%09red/bmor:101746040%09red
Glycolysis / Gluconeogenesis	KEGG PATHWAY	bmor00010	1	46	0.954555	0.999997	XP_049877479.1	http://www.genome.jp/kegg-bin/show_pathway?bmor00010/bmor:101746883%09red
Fatty acid metabolism	KEGG PATHWAY	bmor01212	2	74	0.958467	0.999997	XP_049865801.1|XP_049876236.1	http://www.genome.jp/kegg-bin/show_pathway?bmor01212/bmor:101735457%09red/bmor:101737655%09red
Autophagy - animal	KEGG PATHWAY	bmor04140	2	85	0.977457	0.999997	XP_049868834.1|XP_049867175.1	http://www.genome.jp/kegg-bin/show_pathway?bmor04140/bmor:692390%09red/bmor:100174852%09red
Ubiquitin mediated proteolysis	KEGG PATHWAY	bmor04120	2	88	0.98096	0.999997	XP_049876651.1|XP_049877743.1	http://www.genome.jp/kegg-bin/show_pathway?bmor04120/bmor:733026%09red/bmor:101745791%09red
mTOR signaling pathway	KEGG PATHWAY	bmor04150	2	96	0.987913	0.999997	XP_049871539.1|XP_049867175.1	http://www.genome.jp/kegg-bin/show_pathway?bmor04150/bmor:100174852%09red/bmor:101741216%09red
Carbon metabolism	KEGG PATHWAY	bmor01200	3	126	0.990204	0.999997	XP_049874768.1|XP_049874948.1|XP_049884815.1	http://www.genome.jp/kegg-bin/show_pathway?bmor01200/bmor:101735471%09red/bmor:101745880%09red/bmor:101745635%09red
FoxO signaling pathway	KEGG PATHWAY	bmor04068	1	71	0.991256	0.999997	XP_049883951.1	http://www.genome.jp/kegg-bin/show_pathway?bmor04068/bmor:101744944%09red
Endocytosis	KEGG PATHWAY	bmor04144	2	115	0.995975	0.999997	XP_049881486.1|XP_049874083.1	http://www.genome.jp/kegg-bin/show_pathway?bmor04144/bmor:692822%09red/bmor:101737168%09red
Oxidative phosphorylation	KEGG PATHWAY	bmor00190	2	149	0.999466	0.999997	XP_049871145.1|XP_049880228.1	http://www.genome.jp/kegg-bin/show_pathway?bmor00190/bmor:101740551%09red/bmor:101741387%09red
Metabolic pathways	KEGG PATHWAY	bmor01100	42	1142	0.999997	0.999997	XP_049877473.1|XP_049886282.1|XP_049883494.1|XP_049871145.1|XP_049879147.1|XP_049865022.1|XP_049867133.1|XP_049876236.1|XP_049882966.1|XP_049880228.1|XP_049874983.1|XP_049865801.1|XP_049874768.1|XP_049877482.1|XP_049884815.1|XP_049872481.1|XP_049867765.1|XP_049887581.1|XP_049868805.1|XP_049874984.1|XP_049885624.1|XP_049883520.1|XP_049875311.1|XP_049874948.1|XP_049879501.1|XP_049870215.1|XP_049875…	http://www.genome.jp/kegg-bin/show_pathway?bmor01100/bmor:101740551%09red/bmor:101746707%09red/bmor:101735934%09red/bmor:692593%09red/bmor:101741387%09red/bmor:692995%09red/bmor:101742749%09red/bmor:101741427%09red/bmor:692757%09red/bmor:100126537%09red/bmor:101741112%09red/bmor:101738607%09red/bmor:101741966%09red/bmor:101742640%09red/bmor:101739464%09red/bmor:101744821%09red/bmor:101745087%09re…
--------------------
#Term	Database	ID	Input number	Background number	P-Value	Corrected P-Value	Input	Hyperlink
--------------------
#Term	Database	ID	Input number	Background number	P-Value	Corrected P-Value	Input	Hyperlink
--------------------

## Sheet: KEGG_nPBW-BtR vs. sPBW-BtR_down
##Databases: KEGG PATHWAY
##Statistical test method: hypergeometric test / Fisher's exact test
##FDR correction method: Benjamini and Hochberg
#Term	Database	ID	Input number	Background number	P-Value	Corrected P-Value	Input	Hyperlink
Metabolic pathways	KEGG PATHWAY	bmor01100	183	1142	1.24463e-12	1.39398e-10	XP_049877263.1|XP_049882424.1|XP_049879140.1|XP_049885494.1|XP_049867475.1|XP_049874698.1|XP_049885824.1|XP_049877021.1|XP_049873907.1|XP_049883756.1|XP_049880374.1|XP_049870377.1|XP_049869830.1|XP_049866893.1|XP_049878882.1|XP_049881390.1|XP_049865248.1|XP_049878203.1|XP_049876520.1|XP_049882450.1|XP_049885635.1|XP_049870206.1|XP_049880331.1|XP_049865265.1|XP_049870075.1|XP_049880475.1|XP_049876…	http://www.genome.jp/kegg-bin/show_pathway?bmor01100/bmor:101743283%09red/bmor:101746568%09red/bmor:101740961%09red/bmor:101746766%09red/bmor:100127057%09red/bmor:101741387%09red/bmor:101745943%09red/bmor:101744897%09red/bmor:101736985%09red/bmor:101744141%09red/bmor:101741175%09red/bmor:101745064%09red/bmor:101740449%09red/bmor:733130%09red/bmor:101742176%09red/bmor:101744618%09red/bmor:692543%0…
Carbon metabolism	KEGG PATHWAY	bmor01200	34	126	2.69341e-07	1.50831e-05	XP_049875366.1|XP_049879140.1|XP_049887831.1|XP_049870336.1|XP_049885931.1|XP_049871493.1|XP_049873451.1|XP_049877862.1|XP_049877863.1|XP_049877893.1|XP_049885889.1|XP_049866298.1|XP_049877860.1|XP_049871490.1|XP_049885425.1|XP_049885840.1|XP_049886098.1|XP_049881390.1|XP_049873339.1|XP_049876520.1|XP_049884080.1|XP_049871068.1|XP_049886100.1|XP_049867197.1|XP_049877859.1|XP_049884658.1|XP_049877…	http://www.genome.jp/kegg-bin/show_pathway?bmor01200/bmor:101737646%09red/bmor:101746722%09red/bmor:101740961%09red/bmor:101746766%09red/bmor:101740619%09red/bmor:101746658%09red/bmor:101736985%09red/bmor:732915%09red/bmor:101741175%09red/bmor:101742176%09red/bmor:101738798%09red/bmor:101744557%09red/bmor:101744675%09red/bmor:101737329%09red/bmor:692939%09red/bmor:101740956%09red/bmor:101741659%0…
Glycine, serine and threonine metabolism	KEGG PATHWAY	bmor00260	14	39	7.57343e-05	0.00240028	XP_049882461.1|XP_049887024.1|XP_049885889.1|XP_049866298.1|XP_049877860.1|XP_049877858.1|XP_049873802.1|XP_049869165.1|XP_049885425.1|XP_049867475.1|XP_049877859.1|XP_049877862.1|XP_049869845.1|XP_049877863.1	http://www.genome.jp/kegg-bin/show_pathway?bmor00260/bmor:101735616%09red/bmor:101741242%09red/bmor:101743217%09red/bmor:101741659%09red/bmor:101736065%09red/bmor:101744557%09red/bmor:101743034%09red/bmor:101736784%09red/bmor:101738292%09red/bmor:101744428%09red/bmor:101746658%09red/bmor:101740961%09red/bmor:101741102%09red/bmor:101737288%09red
Biosynthesis of amino acids	KEGG PATHWAY	bmor01230	20	75	8.57243e-05	0.00240028	XP_049877858.1|XP_049866165.1|XP_049866308.1|XP_049884658.1|XP_049877860.1|XP_049871490.1|XP_049887831.1|XP_049873802.1|XP_049869165.1|XP_049885931.1|XP_049884080.1|XP_049885840.1|XP_049877859.1|XP_049877863.1|XP_049879140.1|XP_049881379.1|XP_049881390.1|XP_049877862.1|XP_049870336.1|XP_049867251.1	http://www.genome.jp/kegg-bin/show_pathway?bmor01230/bmor:101740956%09red/bmor:101735436%09red/bmor:751838%09red/bmor:101745490%09red/bmor:101741446%09red/bmor:101741659%09red/bmor:101736083%09red/bmor:101741242%09red/bmor:101740847%09red/bmor:101740961%09red/bmor:101744557%09red/bmor:733021%09red/bmor:101736784%09red/bmor:692848%09red/bmor:101743550%09red/bmor:101746658%09red/bmor:101741940%09re…
Pyruvate metabolism	KEGG PATHWAY	bmor00620	13	41	0.000369658	0.00828035	XP_049875366.1|XP_049882376.1|XP_049876520.1|XP_049870336.1|XP_049884758.1|XP_049867475.1|XP_049879945.1|XP_049873451.1|XP_049868382.1|XP_049865517.1|XP_049873907.1|XP_049871173.1|XP_049865516.1	http://www.genome.jp/kegg-bin/show_pathway?bmor00620/bmor:101743474%09red/bmor:101746722%09red/bmor:101736985%09red/bmor:733130%09red/bmor:101744897%09red/bmor:101738798%09red/bmor:101746766%09red/bmor:692889%09red/bmor:101743580%09red/bmor:101735616%09red/bmor:101741940%09red/bmor:101746906%09red/bmor:101741175%09red
Glyoxylate and dicarboxylate metabolism	KEGG PATHWAY	bmor00630	12	39	0.000768046	0.0128182	XP_049885889.1|XP_049876520.1|XP_049866298.1|XP_049885425.1|XP_049884758.1|XP_049884080.1|XP_049873451.1|XP_049865517.1|XP_049866165.1|XP_049865516.1|XP_049867251.1|XP_049884658.1	http://www.genome.jp/kegg-bin/show_pathway?bmor00630/bmor:101740956%09red/bmor:101735436%09red/bmor:101743217%09red/bmor:101741446%09red/bmor:101736985%09red/bmor:101737646%09red/bmor:101736065%09red/bmor:101746766%09red/bmor:101746722%09red/bmor:101744428%09red/bmor:101746906%09red/bmor:101741175%09red
Glycolysis / Gluconeogenesis	KEGG PATHWAY	bmor00010	13	46	0.000914986	0.0128182	XP_049884758.1|XP_049879140.1|XP_049881379.1|XP_049870336.1|XP_049867475.1|XP_049885931.1|XP_049879945.1|XP_049871493.1|XP_049868382.1|XP_049876066.1|XP_049881390.1|XP_049885297.1|XP_049878813.1	http://www.genome.jp/kegg-bin/show_pathway?bmor00010/bmor:101737885%09red/bmor:101743212%09red/bmor:101745490%09red/bmor:101746722%09red/bmor:733130%09red/bmor:101741280%09red/bmor:101743550%09red/bmor:101740847%09red/bmor:692889%09red/bmor:732915%09red/bmor:101741940%09red/bmor:101735616%09red
Phosphatidylinositol signaling system	KEGG PATHWAY	bmor04070	14	53	0.00103004	0.0128182	XP_049876322.1|XP_049882583.1|XP_049866710.1|XP_049883575.1|XP_049887709.1|XP_049873884.1|XP_049885667.1|XP_049873170.1|XP_049879625.1|XP_049870075.1|XP_049865518.1|XP_049878882.1|XP_049873277.1|XP_049871886.1	http://www.genome.jp/kegg-bin/show_pathway?bmor04070/bmor:101741961%09red/bmor:101735646%09red/bmor:101745704%09red/bmor:101746568%09red/bmor:101741278%09red/bmor:101738501%09red/bmor:101742981%09red/bmor:101741396%09red/bmor:101740803%09red/bmor:101740114%09red/bmor:101741374%09red/bmor:101745952%09red/bmor:101740354%09red/bmor:101743450%09red
Glycerolipid metabolism	KEGG PATHWAY	bmor00561	14	53	0.00103004	0.0128182	XP_049866525.1|XP_049887206.1|XP_049887709.1|XP_049877035.1|XP_049885769.1|XP_049870202.1|XP_049882583.1|XP_049883580.1|XP_049869183.1|XP_049867475.1|XP_049868382.1|XP_049869292.1|XP_049877021.1|XP_049877011.1	http://www.genome.jp/kegg-bin/show_pathway?bmor00561/bmor:101741961%09red/bmor:101745704%09red/bmor:101745715%09red/bmor:101745213%09red/bmor:101745361%09red/bmor:101735542%09red/bmor:101745230%09red/bmor:101741440%09red/bmor:692889%09red/bmor:101736565%09red/bmor:101745064%09red/bmor:101735616%09red/bmor:101742124%09red/bmor:101736437%09red
Valine, leucine and isoleucine biosynthesis	KEGG PATHWAY	bmor00290	5	6	0.00118106	0.0132278	XP_049877860.1|XP_049877862.1|XP_049877858.1|XP_049877863.1|XP_049877859.1	http://www.genome.jp/kegg-bin/show_pathway?bmor00290/bmor:101741242%09red/bmor:101746658%09red/bmor:101741659%09red/bmor:101741102%09red/bmor:101740961%09red
Citrate cycle (TCA cycle)	KEGG PATHWAY	bmor00020	12	42	0.00131622	0.0134015	XP_049875366.1|XP_049867197.1|XP_049884080.1|XP_049884658.1|XP_049876520.1|XP_049879945.1|XP_049886098.1|XP_049873451.1|XP_049865517.1|XP_049886100.1|XP_049865516.1|XP_049877893.1	http://www.genome.jp/kegg-bin/show_pathway?bmor00020/bmor:101740956%09red/bmor:101739338%09red/bmor:101736985%09red/bmor:733130%09red/bmor:101737646%09red/bmor:101744897%09red/bmor:101742176%09red/bmor:101746766%09red/bmor:101740619%09red/bmor:101737329%09red/bmor:101746906%09red/bmor:101741175%09red
Inositol phosphate metabolism	KEGG PATHWAY	bmor00562	12	46	0.00251455	0.0234691	XP_049866710.1|XP_049883575.1|XP_049876322.1|XP_049870075.1|XP_049885667.1|XP_049879625.1|XP_049879160.1|XP_049878882.1|XP_049879151.1|XP_049873277.1|XP_049876075.1|XP_049871886.1	http://www.genome.jp/kegg-bin/show_pathway?bmor00562/bmor:101735646%09red/bmor:100101177%09red/bmor:101746568%09red/bmor:101741278%09red/bmor:101745192%09red/bmor:101741396%09red/bmor:101745369%09red/bmor:101740803%09red/bmor:101741374%09red/bmor:101745952%09red/bmor:101740354%09red/bmor:101743450%09red
Phagosome	KEGG PATHWAY	bmor04145	16	78	0.00438508	0.0355188	XP_049887879.1|XP_049865470.1|XP_049881892.1|XP_049874969.1|XP_049885494.1|XP_049884235.1|XP_049866214.1|XP_049869830.1|XP_049885369.1|XP_049873365.1|XP_049868898.1|XP_049871805.1|XP_049870525.1|XP_049887824.1|XP_049887880.1|XP_049871886.1	http://www.genome.jp/kegg-bin/show_pathway?bmor04145/bmor:100101153%09red/bmor:100145914%09red/bmor:105841907%09red/bmor:101736734%09red/bmor:692430%09red/bmor:692429%09red/bmor:101743784%09red/bmor:733120%09red/bmor:101736898%09red/bmor:692512%09red/bmor:101742516%09red/bmor:101744975%09red/bmor:100037424%09red/bmor:101744447%09red/bmor:101743450%09red
Amino sugar and nucleotide sugar metabolism	KEGG PATHWAY	bmor00520	12	50	0.00447989	0.0355188	XP_049878203.1|XP_049864951.1|XP_049883129.1|XP_049877493.1|XP_049885635.1|XP_049876908.1|XP_049878744.1|XP_049874194.1|XP_049880653.1|XP_049877247.1|XP_049876066.1|XP_049881300.1	http://www.genome.jp/kegg-bin/show_pathway?bmor00520/bmor:100038345%09red/bmor:693039%09red/bmor:692816%09red/bmor:101736080%09red/bmor:101744836%09red/bmor:101743243%09red/bmor:101743965%09red/bmor:101743212%09red/bmor:692647%09red/bmor:101740272%09red/bmor:101746108%09red/bmor:101745028%09red
Purine metabolism	KEGG PATHWAY	bmor00230	20	109	0.00475699	0.0355188	XP_049884530.1|XP_049864979.1|XP_049872155.1|XP_049877263.1|XP_049866264.1|XP_049867145.1|XP_049866969.1|XP_049872302.1|XP_049871490.1|XP_049872942.1|XP_049885552.1|XP_049874539.1|XP_049885824.1|XP_049866893.1|XP_049879931.1|XP_049876066.1|XP_049884907.1|XP_049875015.1|XP_049870336.1|XP_049876799.1	http://www.genome.jp/kegg-bin/show_pathway?bmor00230/bmor:101737205%09red/bmor:101741402%09red/bmor:732910%09red/bmor:101743212%09red/bmor:733021%09red/bmor:101735940%09red/bmor:101737425%09red/bmor:101736367%09red/bmor:101737606%09red/bmor:101739179%09red/bmor:101741806%09red/bmor:101744382%09red/bmor:101739615%09red/bmor:101743020%09red/bmor:101744981%09red/bmor:101741940%09red/bmor:101736237%0…
Galactose metabolism	KEGG PATHWAY	bmor00052	8	28	0.00817674	0.0562047	XP_049875924.1|XP_049881379.1|XP_049885635.1|XP_049869183.1|XP_049876066.1|XP_049881390.1|XP_049885297.1|XP_049878813.1	http://www.genome.jp/kegg-bin/show_pathway?bmor00052/bmor:101737885%09red/bmor:101743212%09red/bmor:101745490%09red/bmor:101741280%09red/bmor:101744836%09red/bmor:101738885%09red/bmor:101736565%09red
Oxidative phosphorylation	KEGG PATHWAY	bmor00190	24	149	0.00880979	0.0562047	XP_049877864.1|XP_049885409.1|XP_049885494.1|XP_049874698.1|XP_049878434.1|XP_049877764.1|XP_049870377.1|XP_049887311.1|XP_049871805.1|XP_049870210.1|XP_049869830.1|XP_049877831.1|XP_049886098.1|XP_049871943.1|XP_049884989.1|XP_049880331.1|XP_049885969.1|XP_049877143.1|XP_049884961.1|XP_049886100.1|XP_049880475.1|XP_049880356.1|XP_049874969.1|XP_049880353.1	http://www.genome.jp/kegg-bin/show_pathway?bmor00190/bmor:101743663%09red/bmor:751613%09red/bmor:101742176%09red/bmor:101739282%09red/bmor:101741387%09red/bmor:101737916%09red/bmor:101741235%09red/bmor:101744457%09red/bmor:101742516%09red/bmor:101736488%09red/bmor:101740879%09red/bmor:733118%09red/bmor:101740387%09red/bmor:101736898%09red/bmor:101743749%09red/bmor:100037424%09red/bmor:101745754%0…
Thiamine metabolism	KEGG PATHWAY	bmor00730	6	17	0.00953472	0.0562047	XP_049865248.1|XP_049872155.1|XP_049875109.1|XP_049866969.1|XP_049865265.1|XP_049865249.1	http://www.genome.jp/kegg-bin/show_pathway?bmor00730/bmor:101743834%09red/bmor:693074%09red/bmor:101736237%09red/bmor:101736367%09red/bmor:692396%09red
Glycosaminoglycan degradation	KEGG PATHWAY	bmor00531	6	17	0.00953472	0.0562047	XP_049880987.1|XP_049876908.1|XP_049874194.1|XP_049877247.1|XP_049880374.1|XP_049880375.1	http://www.genome.jp/kegg-bin/show_pathway?bmor00531/bmor:100038345%09red/bmor:101735594%09red/bmor:101745028%09red/bmor:101742059%09red/bmor:692647%09red
Glycerophospholipid metabolism	KEGG PATHWAY	bmor00564	14	72	0.0109507	0.0613239	XP_049884279.1|XP_049873463.1|XP_049885939.1|XP_049887206.1|XP_049887709.1|XP_049877035.1|XP_049870418.1|XP_049882583.1|XP_049883580.1|XP_049885769.1|XP_049869292.1|XP_049877021.1|XP_049883756.1|XP_049877011.1	http://www.genome.jp/kegg-bin/show_pathway?bmor00564/bmor:101737612%09red/bmor:101741961%09red/bmor:101745715%09red/bmor:101741406%09red/bmor:101745361%09red/bmor:101745704%09red/bmor:101745230%09red/bmor:101741440%09red/bmor:101736119%09red/bmor:101745213%09red/bmor:101736679%09red/bmor:101743589%09red/bmor:101736437%09red/bmor:101745064%09red
Ubiquitin mediated proteolysis	KEGG PATHWAY	bmor04120	16	88	0.0116408	0.062084	XP_049886937.1|XP_049885737.1|XP_049882084.1|XP_049877051.1|XP_049883343.1|XP_049867201.1|XP_049877921.1|XP_049877373.1|XP_049876458.1|XP_049875865.1|XP_049877002.1|XP_049874760.1|XP_049873613.1|XP_049885242.1|XP_049872549.1|XP_049873401.1	http://www.genome.jp/kegg-bin/show_pathway?bmor04120/bmor:101739047%09red/bmor:101738795%09red/bmor:101739053%09red/bmor:101740542%09red/bmor:101743923%09red/bmor:101743548%09red/bmor:101743486%09red/bmor:101739865%09red/bmor:101740182%09red/bmor:101735671%09red/bmor:101743026%09red/bmor:101739389%09red/bmor:101744303%09red/bmor:105842826%09red/bmor:692576%09red/bmor:101746071%09red
Hedgehog signaling pathway - fly	KEGG PATHWAY	bmor04341	8	31	0.0133302	0.0678628	XP_049876672.1|XP_049872076.1|XP_049875131.1|XP_049864949.1|XP_049883343.1|XP_049865145.1|XP_049880484.1|XP_049875133.1	http://www.genome.jp/kegg-bin/show_pathway?bmor04341/bmor:101738795%09red/bmor:101739040%09red/bmor:101736532%09red/bmor:101737144%09red/bmor:101747093%09red/bmor:100862751%09red/bmor:692674%09red
Pentose phosphate pathway	KEGG PATHWAY	bmor00030	7	26	0.0168158	0.0818858	XP_049879140.1|XP_049881379.1|XP_049871490.1|XP_049885840.1|XP_049871493.1|XP_049876066.1|XP_049881390.1	http://www.genome.jp/kegg-bin/show_pathway?bmor00030/bmor:101743550%09red/bmor:101743212%09red/bmor:101745490%09red/bmor:733021%09red/bmor:692848%09red/bmor:732915%09red
Histidine metabolism	KEGG PATHWAY	bmor00340	4	10	0.024089	0.10735	XP_049882788.1|XP_049882461.1|XP_049867475.1|XP_049868382.1	http://www.genome.jp/kegg-bin/show_pathway?bmor00340/bmor:692889%09red/bmor:101735616%09red/bmor:101737288%09red/bmor:101744680%09red
MAPK signaling pathway - fly	KEGG PATHWAY	bmor04013	14	81	0.0247206	0.10735	XP_049876797.1|XP_049884774.1|XP_049877525.1|XP_049876064.1|XP_049871958.1|XP_049868898.1|XP_049865407.1|XP_049871366.1|XP_049886956.1|XP_049874760.1|XP_049879806.1|XP_049884710.1|XP_049887077.1|XP_049875019.1	http://www.genome.jp/kegg-bin/show_pathway?bmor04013/bmor:101741679%09red/bmor:101736712%09red/bmor:692520%09red/bmor:101736734%09red/bmor:101735671%09red/bmor:101741873%09red/bmor:101746155%09red/bmor:101743155%09red/bmor:101741200%09red/bmor:101743695%09red/bmor:101746370%09red/bmor:101740276%09red/bmor:100862655%09red
Apoptosis - fly	KEGG PATHWAY	bmor04214	10	50	0.0249205	0.10735	XP_049872371.1|XP_049867468.1|XP_049878849.1|XP_049877525.1|XP_049871958.1|XP_049872376.1|XP_049887960.1|XP_049875840.1|XP_049869805.1|XP_049884710.1	http://www.genome.jp/kegg-bin/show_pathway?bmor04214/bmor:101741679%09red/bmor:692520%09red/bmor:101735759%09red/bmor:100529220%09red/bmor:101738358%09red/bmor:693011%09red/bmor:101743155%09red/bmor:100529085%09red/bmor:692756%09red
Longevity regulating pathway - multiple species	KEGG PATHWAY	bmor04213	13	75	0.0292212	0.121214	XP_049881920.1|XP_049864949.1|XP_049866710.1|XP_049884907.1|XP_049871162.1|XP_049878810.1|XP_049871958.1|XP_049874539.1|XP_049866893.1|XP_049881927.1|XP_049878898.1|XP_049881928.1|XP_049881926.1	http://www.genome.jp/kegg-bin/show_pathway?bmor04213/bmor:101741402%09red/bmor:692533%09red/bmor:101737606%09red/bmor:101740629%09red/bmor:101736532%09red/bmor:101741278%09red/bmor:733093%09red/bmor:692520%09red/bmor:692487%09red/bmor:101739615%09red/bmor:692591%09red/bmor:692488%09red
Autophagy - animal	KEGG PATHWAY	bmor04140	14	85	0.0338659	0.135464	XP_049880535.1|XP_049876322.1|XP_049864949.1|XP_049866710.1|XP_049879791.1|XP_049884375.1|XP_049871958.1|XP_049886330.1|XP_049881048.1|XP_049877925.1|XP_049878882.1|XP_049879125.1|XP_049873367.1|XP_049871886.1	http://www.genome.jp/kegg-bin/show_pathway?bmor04140/bmor:101741938%09red/bmor:692520%09red/bmor:101740636%09red/bmor:101740494%09red/bmor:101744058%09red/bmor:101741618%09red/bmor:101745914%09red/bmor:101736532%09red/bmor:101741278%09red/bmor:101739525%09red/bmor:101745952%09red/bmor:101743450%09red/bmor:101740354%09red/bmor:101740431%09red
Nitrogen metabolism	KEGG PATHWAY	bmor00910	5	18	0.0373512	0.144253	XP_049870343.1|XP_049866165.1|XP_049867251.1|XP_049866308.1|XP_049871068.1	http://www.genome.jp/kegg-bin/show_pathway?bmor00910/bmor:101741446%09red/bmor:101735436%09red/bmor:751838%09red/bmor:101745943%09red/bmor:692939%09red
Insect hormone biosynthesis	KEGG PATHWAY	bmor00981	7	32	0.039343	0.146881	XP_049881424.1|XP_049881304.1|XP_049876442.1|XP_049881303.1|XP_049874655.1|XP_049868382.1|XP_049874477.1	http://www.genome.jp/kegg-bin/show_pathway?bmor00981/bmor:100286798%09red/bmor:692445%09red/bmor:100415790%09red/bmor:692686%09red/bmor:692889%09red/bmor:692634%09red
Endocytosis	KEGG PATHWAY	bmor04144	17	115	0.0460142	0.166245	XP_049876041.1|XP_049869132.1|XP_049876042.1|XP_049882084.1|XP_049871162.1|XP_049878898.1|XP_049869697.1|XP_049871110.1|XP_049887922.1|XP_049877373.1|XP_049872977.1|XP_049880484.1|XP_049887565.1|XP_049883866.1|XP_049869646.1|XP_049884710.1|XP_049870290.1	http://www.genome.jp/kegg-bin/show_pathway?bmor04144/bmor:101741679%09red/bmor:733063%09red/bmor:101744543%09red/bmor:101737456%09red/bmor:101740542%09red/bmor:101740629%09red/bmor:101735699%09red/bmor:101740182%09red/bmor:101739334%09red/bmor:101745630%09red/bmor:692468%09red/bmor:733093%09red/bmor:101747093%09red/bmor:101747115%09red/bmor:101742411%09red
Hippo signaling pathway - fly	KEGG PATHWAY	bmor04391	10	57	0.0487734	0.16924	XP_049876041.1|XP_049876042.1|XP_049868398.1|XP_049878140.1|XP_049875008.1|XP_049873365.1|XP_049873706.1|XP_049873690.1|XP_049881391.1|XP_049868233.1	http://www.genome.jp/kegg-bin/show_pathway?bmor04391/bmor:101746256%09red/bmor:100145914%09red/bmor:101742798%09red/bmor:101736618%09red/bmor:100216493%09red/bmor:101739220%09red/bmor:692468%09red/bmor:101743997%09red/bmor:101742023%09red
Sphingolipid metabolism	KEGG PATHWAY	bmor00600	7	34	0.0498654	0.16924	XP_049877035.1|XP_049865621.1|XP_049877021.1|XP_049883892.1|XP_049888140.1|XP_049877011.1|XP_049879537.1	http://www.genome.jp/kegg-bin/show_pathway?bmor00600/bmor:101746851%09red/bmor:101745213%09red/bmor:101745361%09red/bmor:101744040%09red/bmor:101746948%09red/bmor:101741392%09red/bmor:101745064%09red
Arginine and proline metabolism	KEGG PATHWAY	bmor00330	6	27	0.0516561	0.170161	XP_049882461.1|XP_049882967.1|XP_049887831.1|XP_049867475.1|XP_049868382.1|XP_049888168.1	http://www.genome.jp/kegg-bin/show_pathway?bmor00330/bmor:692889%09red/bmor:101736083%09red/bmor:732996%09red/bmor:692924%09red/bmor:101737288%09red/bmor:101735616%09red
Glycosphingolipid biosynthesis - ganglio series	KEGG PATHWAY	bmor00604	3	8	0.0568553	0.181937	XP_049874194.1|XP_049876908.1|XP_049877247.1	http://www.genome.jp/kegg-bin/show_pathway?bmor00604/bmor:100038345%09red/bmor:101745028%09red/bmor:692647%09red
Other glycan degradation	KEGG PATHWAY	bmor00511	6	29	0.0658669	0.204919	XP_049867209.1|XP_049876908.1|XP_049881967.1|XP_049874194.1|XP_049877247.1|XP_049888140.1	http://www.genome.jp/kegg-bin/show_pathway?bmor00511/bmor:100038345%09red/bmor:101743490%09red/bmor:101745656%09red/bmor:101741392%09red/bmor:692647%09red/bmor:101745028%09red
TGF-beta signaling pathway	KEGG PATHWAY	bmor04350	7	37	0.0687054	0.207973	XP_049866957.1|XP_049868393.1|XP_049882551.1|XP_049868398.1|XP_049876064.1|XP_049871218.1|XP_049868394.1	http://www.genome.jp/kegg-bin/show_pathway?bmor04350/bmor:101742798%09red/bmor:101741200%09red/bmor:101744534%09red/bmor:100037433%09red/bmor:101741860%09red/bmor:100862767%09red
ABC transporters	KEGG PATHWAY	bmor02010	6	30	0.0737459	0.214848	XP_049881483.1|XP_049867954.1|XP_049883671.1|XP_049877251.1|XP_049887665.1|XP_049888074.1	http://www.genome.jp/kegg-bin/show_pathway?bmor02010/bmor:101735553%09red/bmor:101745183%09red/bmor:101739554%09red/bmor:100862790%09red/bmor:101736702%09red/bmor:101741236%09red
Glutathione metabolism	KEGG PATHWAY	bmor00480	9	54	0.0748133	0.214848	XP_049876420.1|XP_049870320.1|XP_049877949.1|XP_049870021.1|XP_049873969.1|XP_049872902.1|XP_049887367.1|XP_049888168.1|XP_049870027.1	http://www.genome.jp/kegg-bin/show_pathway?bmor00480/bmor:101744108%09red/bmor:732996%09red/bmor:692563%09red/bmor:105841246%09red/bmor:100127057%09red/bmor:692543%09red/bmor:692941%09red
beta-Alanine metabolism	KEGG PATHWAY	bmor00410	6	31	0.0821379	0.229986	XP_049873339.1|XP_049867475.1|XP_049871481.1|XP_049866569.1|XP_049868382.1|XP_049873454.1	http://www.genome.jp/kegg-bin/show_pathway?bmor00410/bmor:100329149%09red/bmor:692889%09red/bmor:101744386%09red/bmor:101744675%09red/bmor:101735616%09red/bmor:101740449%09red
AGE-RAGE signaling pathway in diabetic complications	KEGG PATHWAY	bmor04933	6	32	0.0910373	0.248687	XP_049866710.1|XP_049883575.1|XP_049866652.1|XP_049871958.1|XP_049868898.1|XP_049866664.1	http://www.genome.jp/kegg-bin/show_pathway?bmor04933/bmor:101736620%09red/bmor:101735646%09red/bmor:101736734%09red/bmor:692520%09red/bmor:101741278%09red/bmor:692625%09red
Fructose and mannose metabolism	KEGG PATHWAY	bmor00051	6	33	0.100436	0.265562	XP_049879140.1|XP_049881379.1|XP_049875386.1|XP_049869183.1|XP_049871493.1|XP_049881390.1	http://www.genome.jp/kegg-bin/show_pathway?bmor00051/bmor:732915%09red/bmor:101743550%09red/bmor:101743996%09red/bmor:101745490%09red/bmor:101736565%09red
Apoptosis - multiple species	KEGG PATHWAY	bmor04215	4	18	0.104267	0.265562	XP_049872376.1|XP_049875840.1|XP_049872371.1|XP_049872549.1	http://www.genome.jp/kegg-bin/show_pathway?bmor04215/bmor:692576%09red/bmor:100529085%09red/bmor:101738358%09red
Glycosphingolipid biosynthesis - globo and isoglobo series	KEGG PATHWAY	bmor00603	3	11	0.104328	0.265562	XP_049874194.1|XP_049876908.1|XP_049877247.1	http://www.genome.jp/kegg-bin/show_pathway?bmor00603/bmor:100038345%09red/bmor:101745028%09red/bmor:692647%09red
ECM-receptor interaction	KEGG PATHWAY	bmor04512	5	27	0.121764	0.303056	XP_049866664.1|XP_049866652.1|XP_049872065.1|XP_049870916.1|XP_049870409.1	http://www.genome.jp/kegg-bin/show_pathway?bmor04512/bmor:101736620%09red/bmor:692625%09red/bmor:101745246%09red/bmor:101742903%09red/bmor:101746136%09red
N-Glycan biosynthesis	KEGG PATHWAY	bmor00510	6	36	0.131515	0.313397	XP_049871425.1|XP_049875924.1|XP_049870358.1|XP_049887764.1|XP_049869643.1|XP_049877504.1	http://www.genome.jp/kegg-bin/show_pathway?bmor00510/bmor:101735304%09red/bmor:101737095%09red/bmor:101742043%09red/bmor:101744335%09red/bmor:101738885%09red/bmor:101745247%09red
Fatty acid degradation	KEGG PATHWAY	bmor00071	6	36	0.131515	0.313397	XP_049873339.1|XP_049867475.1|XP_049873454.1|XP_049876497.1|XP_049868382.1|XP_049877414.1	http://www.genome.jp/kegg-bin/show_pathway?bmor00071/bmor:101742560%09red/bmor:692889%09red/bmor:101744386%09red/bmor:101744675%09red/bmor:101735616%09red/bmor:105841738%09red
Alanine, aspartate and glutamate metabolism	KEGG PATHWAY	bmor00250	6	38	0.154482	0.360458	XP_049871068.1|XP_049866308.1|XP_049887831.1|XP_049866569.1|XP_049866165.1|XP_049867251.1	http://www.genome.jp/kegg-bin/show_pathway?bmor00250/bmor:101735436%09red/bmor:751838%09red/bmor:101741446%09red/bmor:101736083%09red/bmor:101740449%09red/bmor:692939%09red
Lysosome	KEGG PATHWAY	bmor04142	15	122	0.164246	0.37542	XP_049874194.1|XP_049879197.1|XP_049885494.1|XP_049875522.1|XP_049869830.1|XP_049878298.1|XP_049869394.1|XP_049875443.1|XP_049877247.1|XP_049872480.1|XP_049867968.1|XP_049880374.1|XP_049888140.1|XP_049876908.1|XP_049880375.1	http://www.genome.jp/kegg-bin/show_pathway?bmor04142/bmor:101741653%09red/bmor:100038345%09red/bmor:101737242%09red/bmor:101742059%09red/bmor:101745483%09red/bmor:101744899%09red/bmor:692382%09red/bmor:101741392%09red/bmor:692647%09red/bmor:101736898%09red/bmor:101745131%09red/bmor:101745028%09red/bmor:101737626%09red/bmor:101742516%09red
Mannose type O-glycan biosynthesis	KEGG PATHWAY	bmor00515	2	7	0.168034	0.376396	XP_049878259.1|XP_049875924.1	http://www.genome.jp/kegg-bin/show_pathway?bmor00515/bmor:101736465%09red/bmor:101738885%09red
Lysine degradation	KEGG PATHWAY	bmor00310	6	40	0.179072	0.382203	XP_049870950.1|XP_049867475.1|XP_049868382.1|XP_049867779.1|XP_049881066.1|XP_049877893.1	http://www.genome.jp/kegg-bin/show_pathway?bmor00310/bmor:101742724%09red/bmor:692889%09red/bmor:101743783%09red/bmor:101740619%09red/bmor:101735616%09red/bmor:101740126%09red
Dorso-ventral axis formation	KEGG PATHWAY	bmor04320	4	23	0.181841	0.382203	XP_049884246.1|XP_049871958.1|XP_049884710.1|XP_049876482.1	http://www.genome.jp/kegg-bin/show_pathway?bmor04320/bmor:101741679%09red/bmor:100125337%09red/bmor:692520%09red/bmor:101735954%09red
Autophagy - other	KEGG PATHWAY	bmor04136	4	23	0.181841	0.382203	XP_049879791.1|XP_049886330.1|XP_049881048.1|XP_049871886.1	http://www.genome.jp/kegg-bin/show_pathway?bmor04136/bmor:101740636%09red/bmor:101740431%09red/bmor:101740494%09red/bmor:101743450%09red
mTOR signaling pathway	KEGG PATHWAY	bmor04150	12	96	0.184276	0.382203	XP_049871805.1|XP_049866710.1|XP_049876322.1|XP_049883300.1|XP_049874969.1|XP_049871958.1|XP_049873762.1|XP_049875131.1|XP_049867496.1|XP_049876074.1|XP_049875133.1|XP_049873651.1	http://www.genome.jp/kegg-bin/show_pathway?bmor04150/bmor:692520%09red/bmor:101736611%09red/bmor:100862751%09red/bmor:101746492%09red/bmor:101741278%09red/bmor:101736087%09red/bmor:101744741%09red/bmor:733120%09red/bmor:101745952%09red/bmor:101740539%09red/bmor:100037424%09red
Tryptophan metabolism	KEGG PATHWAY	bmor00380	5	32	0.189498	0.383843	XP_049882461.1|XP_049870950.1|XP_049867475.1|XP_049868382.1|XP_049877893.1	http://www.genome.jp/kegg-bin/show_pathway?bmor00380/bmor:692889%09red/bmor:101735616%09red/bmor:101740126%09red/bmor:101740619%09red/bmor:101737288%09red
Folate biosynthesis	KEGG PATHWAY	bmor00790	6	41	0.191921	0.383843	XP_049865248.1|XP_049875109.1|XP_049865265.1|XP_049873969.1|XP_049869183.1|XP_049865249.1	http://www.genome.jp/kegg-bin/show_pathway?bmor00790/bmor:101743834%09red/bmor:693074%09red/bmor:692941%09red/bmor:692396%09red/bmor:101736565%09red
Circadian rhythm - fly	KEGG PATHWAY	bmor04711	2	8	0.199043	0.389358	XP_049875131.1|XP_049875133.1	http://www.genome.jp/kegg-bin/show_pathway?bmor04711/bmor:100862751%09red
Mitophagy - animal	KEGG PATHWAY	bmor04137	5	33	0.204417	0.389358	XP_049884375.1|XP_049871958.1|XP_049873367.1|XP_049886330.1|XP_049877925.1	http://www.genome.jp/kegg-bin/show_pathway?bmor04137/bmor:101741618%09red/bmor:692520%09red/bmor:101740431%09red/bmor:101741938%09red/bmor:101739525%09red
Biosynthesis of unsaturated fatty acids	KEGG PATHWAY	bmor01040	6	42	0.205108	0.389358	XP_049873339.1|XP_049879548.1|XP_049868594.1|XP_049878478.1|XP_049873454.1|XP_049868626.1	http://www.genome.jp/kegg-bin/show_pathway?bmor01040/bmor:101744618%09red/bmor:692458%09red/bmor:692568%09red/bmor:101744386%09red/bmor:101744675%09red
Ascorbate and aldarate metabolism	KEGG PATHWAY	bmor00053	7	52	0.215634	0.402516	XP_049868359.1|XP_049883129.1|XP_049867475.1|XP_049881023.1|XP_049879160.1|XP_049868382.1|XP_049879151.1	http://www.genome.jp/kegg-bin/show_pathway?bmor00053/bmor:100101177%09red/bmor:100862803%09red/bmor:101745192%09red/bmor:692889%09red/bmor:101740272%09red/bmor:101735616%09red/bmor:100862821%09red
Sulfur metabolism	KEGG PATHWAY	bmor00920	2	9	0.230641	0.423472	XP_049882450.1|XP_049869412.1	http://www.genome.jp/kegg-bin/show_pathway?bmor00920/bmor:101740027%09red/bmor:101743629%09red
Metabolism of xenobiotics by cytochrome P450	KEGG PATHWAY	bmor00980	8	64	0.246195	0.437326	XP_049876420.1|XP_049877949.1|XP_049870206.1|XP_049865020.1|XP_049881023.1|XP_049872902.1|XP_049868359.1|XP_049887367.1	http://www.genome.jp/kegg-bin/show_pathway?bmor00980/bmor:692543%09red/bmor:100862803%09red/bmor:101744141%09red/bmor:100862821%09red/bmor:105841246%09red
Pentose and glucuronate interconversions	KEGG PATHWAY	bmor00040	8	64	0.246195	0.437326	XP_049883129.1|XP_049870206.1|XP_049885635.1|XP_049865020.1|XP_049881023.1|XP_049869183.1|XP_049868359.1|XP_049870671.1	http://www.genome.jp/kegg-bin/show_pathway?bmor00040/bmor:100862803%09red/bmor:101738077%09red/bmor:101744836%09red/bmor:101736565%09red/bmor:101740272%09red/bmor:101744141%09red/bmor:100862821%09red
Fatty acid metabolism	KEGG PATHWAY	bmor01212	9	74	0.249901	0.437326	XP_049873339.1|XP_049879548.1|XP_049868594.1|XP_049873454.1|XP_049876497.1|XP_049878858.1|XP_049878478.1|XP_049877414.1|XP_049868626.1	http://www.genome.jp/kegg-bin/show_pathway?bmor01212/bmor:101742560%09red/bmor:692458%09red/bmor:101744675%09red/bmor:693037%09red/bmor:101744618%09red/bmor:101744386%09red/bmor:692568%09red/bmor:105841738%09red
Wnt signaling pathway	KEGG PATHWAY	bmor04310	9	76	0.272298	0.455901	XP_049880737.1|XP_049883300.1|XP_049875131.1|XP_049870471.1|XP_049864949.1|XP_049883343.1|XP_049868898.1|XP_049874760.1|XP_049875133.1	http://www.genome.jp/kegg-bin/show_pathway?bmor04310/bmor:101736734%09red/bmor:101740539%09red/bmor:101736219%09red/bmor:100862751%09red/bmor:101736532%09red/bmor:101735671%09red/bmor:101738795%09red/bmor:101745327%09red
Arginine biosynthesis	KEGG PATHWAY	bmor00220	4	28	0.272726	0.455901	XP_049866165.1|XP_049887831.1|XP_049871068.1|XP_049867251.1	http://www.genome.jp/kegg-bin/show_pathway?bmor00220/bmor:101741446%09red/bmor:101735436%09red/bmor:101736083%09red/bmor:692939%09red
Propanoate metabolism	KEGG PATHWAY	bmor00640	4	28	0.272726	0.455901	XP_049873454.1|XP_049884758.1|XP_049866569.1|XP_049873339.1	http://www.genome.jp/kegg-bin/show_pathway?bmor00640/bmor:101746722%09red/bmor:101744386%09red/bmor:101740449%09red/bmor:101744675%09red
Drug metabolism - cytochrome P450	KEGG PATHWAY	bmor00982	7	58	0.293183	0.469272	XP_049882461.1|XP_049876420.1|XP_049877949.1|XP_049881023.1|XP_049872902.1|XP_049868359.1|XP_049887367.1	http://www.genome.jp/kegg-bin/show_pathway?bmor00982/bmor:101737288%09red/bmor:692543%09red/bmor:100862803%09red/bmor:100862821%09red/bmor:105841246%09red
Phenylalanine metabolism	KEGG PATHWAY	bmor00360	2	11	0.294403	0.469272	XP_049882461.1|XP_049887831.1	http://www.genome.jp/kegg-bin/show_pathway?bmor00360/bmor:101736083%09red/bmor:101737288%09red
Starch and sucrose metabolism	KEGG PATHWAY	bmor00500	3	20	0.297485	0.469272	XP_049876066.1|XP_049885635.1|XP_049877346.1	http://www.genome.jp/kegg-bin/show_pathway?bmor00500/bmor:101744836%09red/bmor:101743212%09red/bmor:101736114%09red
Steroid biosynthesis	KEGG PATHWAY	bmor00100	3	20	0.297485	0.469272	XP_049869394.1|XP_049881861.1|XP_049867968.1	http://www.genome.jp/kegg-bin/show_pathway?bmor00100/bmor:101737242%09red/bmor:101737626%09red/bmor:101738979%09red
2-Oxocarboxylic acid metabolism	KEGG PATHWAY	bmor01210	3	21	0.320953	0.492202	XP_049884658.1|XP_049884080.1|XP_049887831.1	http://www.genome.jp/kegg-bin/show_pathway?bmor01210/bmor:101740956%09red/bmor:101736083%09red/bmor:101737646%09red
Protein processing in endoplasmic reticulum	KEGG PATHWAY	bmor04141	14	132	0.32646	0.492202	XP_049881920.1|XP_049881331.1|XP_049871162.1|XP_049878898.1|XP_049887526.1|XP_049881311.1|XP_049887764.1|XP_049881927.1|XP_049869643.1|XP_049875865.1|XP_049878810.1|XP_049881928.1|XP_049881926.1|XP_049879540.1	http://www.genome.jp/kegg-bin/show_pathway?bmor04141/bmor:101737887%09red/bmor:101739047%09red/bmor:692533%09red/bmor:101737095%09red/bmor:101740629%09red/bmor:101738518%09red/bmor:733093%09red/bmor:101737590%09red/bmor:692487%09red/bmor:101738074%09red/bmor:101744335%09red/bmor:692591%09red/bmor:692488%09red
Ether lipid metabolism	KEGG PATHWAY	bmor00565	4	31	0.33046	0.492202	XP_049877021.1|XP_049887030.1|XP_049877035.1|XP_049877011.1	http://www.genome.jp/kegg-bin/show_pathway?bmor00565/bmor:101745064%09red/bmor:101745213%09red/bmor:101745361%09red/bmor:101736689%09red
FoxO signaling pathway	KEGG PATHWAY	bmor04068	8	71	0.332563	0.492202	XP_049876322.1|XP_049866710.1|XP_049884375.1|XP_049871958.1|XP_049884286.1|XP_049879945.1|XP_049869363.1|XP_049884710.1	http://www.genome.jp/kegg-bin/show_pathway?bmor04068/bmor:101741679%09red/bmor:692520%09red/bmor:101741938%09red/bmor:733130%09red/bmor:101741278%09red/bmor:101739081%09red/bmor:101739346%09red/bmor:101745952%09red
Valine, leucine and isoleucine degradation	KEGG PATHWAY	bmor00280	5	41	0.333994	0.492202	XP_049877414.1|XP_049880847.1|XP_049866569.1|XP_049867475.1|XP_049868382.1	http://www.genome.jp/kegg-bin/show_pathway?bmor00280/bmor:692889%09red/bmor:101735616%09red/bmor:692821%09red/bmor:101740449%09red/bmor:105841738%09red
Notch signaling pathway	KEGG PATHWAY	bmor04330	3	22	0.34443	0.500989	XP_049880737.1|XP_049887411.1|XP_049883300.1	http://www.genome.jp/kegg-bin/show_pathway?bmor04330/bmor:101736219%09red/bmor:101739888%09red/bmor:101740539%09red
Cysteine and methionine metabolism	KEGG PATHWAY	bmor00270	5	42	0.350908	0.503867	XP_049865517.1|XP_049873451.1|XP_049865516.1|XP_049887831.1|XP_049876520.1	http://www.genome.jp/kegg-bin/show_pathway?bmor00270/bmor:101746766%09red/bmor:101736985%09red/bmor:101736083%09red/bmor:101746906%09red/bmor:101741175%09red
One carbon pool by folate	KEGG PATHWAY	bmor00670	2	13	0.357367	0.506647	XP_049885425.1|XP_049872942.1	http://www.genome.jp/kegg-bin/show_pathway?bmor00670/bmor:101744981%09red/bmor:101744428%09red
Butanoate metabolism	KEGG PATHWAY	bmor00650	2	14	0.388107	0.530097	XP_049880847.1|XP_049866569.1	http://www.genome.jp/kegg-bin/show_pathway?bmor00650/bmor:692821%09red/bmor:101740449%09red
Nicotinate and nicotinamide metabolism	KEGG PATHWAY	bmor00760	2	14	0.388107	0.530097	XP_049872302.1|XP_049879931.1	http://www.genome.jp/kegg-bin/show_pathway?bmor00760/bmor:101741806%09red/bmor:101744387%09red
Pantothenate and CoA biosynthesis	KEGG PATHWAY	bmor00770	2	14	0.388107	0.530097	XP_049871481.1|XP_049881307.1	http://www.genome.jp/kegg-bin/show_pathway?bmor00770/bmor:101743809%09red/bmor:100329149%09red
Glycosphingolipid biosynthesis - lacto and neolacto series	KEGG PATHWAY	bmor00601	1	5	0.405507	0.54719	XP_049875924.1	http://www.genome.jp/kegg-bin/show_pathway?bmor00601/bmor:101738885%09red
Fatty acid biosynthesis	KEGG PATHWAY	bmor00061	2	15	0.418175	0.557567	XP_049876497.1|XP_049878858.1	http://www.genome.jp/kegg-bin/show_pathway?bmor00061/bmor:101742560%09red/bmor:693037%09red
Neuroactive ligand-receptor interaction	KEGG PATHWAY	bmor04080	7	68	0.431486	0.568546	XP_049880027.1|XP_049880364.1|XP_049881938.1|XP_049876641.1|XP_049877285.1|XP_049887183.1|XP_049870225.1	http://www.genome.jp/kegg-bin/show_pathway?bmor04080/bmor:100174926%09red/bmor:101735316%09red/bmor:692603%09red/bmor:101739308%09red/bmor:100187564%09red/bmor:101735335%09red
D-Glutamine and D-glutamate metabolism	KEGG PATHWAY	bmor00471	1	6	0.454875	0.592396	XP_049871068.1	http://www.genome.jp/kegg-bin/show_pathway?bmor00471/bmor:692939%09red
Phototransduction - fly	KEGG PATHWAY	bmor04745	3	28	0.481249	0.619539	XP_049865518.1|XP_049873884.1|XP_049873365.1	http://www.genome.jp/kegg-bin/show_pathway?bmor04745/bmor:100145914%09red/bmor:101738501%09red/bmor:101742981%09red
Arachidonic acid metabolism	KEGG PATHWAY	bmor00590	3	31	0.544517	0.693022	XP_049870413.1|XP_049876420.1|XP_049877949.1	http://www.genome.jp/kegg-bin/show_pathway?bmor00590/bmor:101743283%09red/bmor:692543%09red
Peroxisome	KEGG PATHWAY	bmor04146	10	112	0.564485	0.710363	XP_049873339.1|XP_049881483.1|XP_049877604.1|XP_049887078.1|XP_049880847.1|XP_049876497.1|XP_049873454.1|XP_049873405.1|XP_049875015.1|XP_049882997.1	http://www.genome.jp/kegg-bin/show_pathway?bmor04146/bmor:101742560%09red/bmor:105841608%09red/bmor:101742196%09red/bmor:101739774%09red/bmor:101735553%09red/bmor:101735660%09red/bmor:101739179%09red/bmor:101744386%09red/bmor:101744675%09red/bmor:692821%09red
SNARE interactions in vesicular transport	KEGG PATHWAY	bmor04130	2	21	0.580205	0.722033	XP_049865405.1|XP_049880145.1	http://www.genome.jp/kegg-bin/show_pathway?bmor04130/bmor:733071%09red/bmor:101742448%09red
Mucin type O-glycan biosynthesis	KEGG PATHWAY	bmor00512	1	11	0.646649	0.780226	XP_049882424.1	http://www.genome.jp/kegg-bin/show_pathway?bmor00512/bmor:101736888%09red
alpha-Linolenic acid metabolism	KEGG PATHWAY	bmor00592	2	24	0.647867	0.780226	XP_049873454.1|XP_049873339.1	http://www.genome.jp/kegg-bin/show_pathway?bmor00592/bmor:101744386%09red/bmor:101744675%09red
Fatty acid elongation	KEGG PATHWAY	bmor00062	2	24	0.647867	0.780226	XP_049877414.1|XP_049879548.1	http://www.genome.jp/kegg-bin/show_pathway?bmor00062/bmor:101744618%09red/bmor:105841738%09red
Pyrimidine metabolism	KEGG PATHWAY	bmor00240	3	37	0.656388	0.780539	XP_049871481.1|XP_049872302.1|XP_049879931.1	http://www.genome.jp/kegg-bin/show_pathway?bmor00240/bmor:101741806%09red/bmor:100329149%09red/bmor:101744387%09red
Proteasome	KEGG PATHWAY	bmor03050	3	38	0.672976	0.780539	XP_049866837.1|XP_049877713.1|XP_049880367.1	http://www.genome.jp/kegg-bin/show_pathway?bmor03050/bmor:101745357%09red/bmor:692896%09red/bmor:101742315%09red
Toll and Imd signaling pathway	KEGG PATHWAY	bmor04624	3	38	0.672976	0.780539	XP_049877525.1|XP_049883343.1|XP_049876602.1	http://www.genome.jp/kegg-bin/show_pathway?bmor04624/bmor:101738795%09red/bmor:101743155%09red/bmor:101737520%09red
Caffeine metabolism	KEGG PATHWAY	bmor00232	1	12	0.676003	0.780539	XP_049875015.1	http://www.genome.jp/kegg-bin/show_pathway?bmor00232/bmor:101739179%09red
Other types of O-glycan biosynthesis	KEGG PATHWAY	bmor00514	1	13	0.70292	0.803337	XP_049875924.1	http://www.genome.jp/kegg-bin/show_pathway?bmor00514/bmor:101738885%09red
Drug metabolism - other enzymes	KEGG PATHWAY	bmor00983	7	93	0.734062	0.830454	XP_049873696.1|XP_049881023.1|XP_049872902.1|XP_049868359.1|XP_049871481.1|XP_049887367.1|XP_049875015.1	http://www.genome.jp/kegg-bin/show_pathway?bmor00983/bmor:100329149%09red/bmor:100862803%09red/bmor:105841246%09red/bmor:100500761%09red/bmor:101739179%09red/bmor:100862821%09red
Glycosaminoglycan biosynthesis - heparan sulfate / heparin	KEGG PATHWAY	bmor00534	1	15	0.750235	0.840263	XP_049872441.1	http://www.genome.jp/kegg-bin/show_pathway?bmor00534/bmor:101741346%09red
Linoleic acid metabolism	KEGG PATHWAY	bmor00591	1	17	0.790019	0.865663	XP_049870413.1	http://www.genome.jp/kegg-bin/show_pathway?bmor00591/bmor:101743283%09red
Hippo signaling pathway - multiple species	KEGG PATHWAY	bmor04392	1	17	0.790019	0.865663	XP_049868233.1	http://www.genome.jp/kegg-bin/show_pathway?bmor04392/bmor:101746256%09red
Retinol metabolism	KEGG PATHWAY	bmor00830	3	47	0.796101	0.865663	XP_049879560.1|XP_049868359.1|XP_049881023.1	http://www.genome.jp/kegg-bin/show_pathway?bmor00830/bmor:101735502%09red/bmor:100862803%09red/bmor:100862821%09red
Tyrosine metabolism	KEGG PATHWAY	bmor00350	2	34	0.812216	0.874694	XP_049882461.1|XP_049887831.1	http://www.genome.jp/kegg-bin/show_pathway?bmor00350/bmor:101736083%09red/bmor:101737288%09red
RNA degradation	KEGG PATHWAY	bmor03018	4	65	0.835268	0.890952	XP_049879971.1|XP_049881379.1|XP_049881390.1|XP_049885931.1	http://www.genome.jp/kegg-bin/show_pathway?bmor03018/bmor:101745490%09red/bmor:101740847%09red/bmor:101738940%09red
Porphyrin and chlorophyll metabolism	KEGG PATHWAY	bmor00860	3	56	0.877906	0.927599	XP_049869845.1|XP_049868359.1|XP_049881023.1	http://www.genome.jp/kegg-bin/show_pathway?bmor00860/bmor:100862803%09red/bmor:100862821%09red/bmor:101738292%09red
Terpenoid backbone biosynthesis	KEGG PATHWAY	bmor00900	1	28	0.91917	0.962122	XP_049882584.1	http://www.genome.jp/kegg-bin/show_pathway?bmor00900/bmor:100101204%09red
mRNA surveillance pathway	KEGG PATHWAY	bmor03015	2	64	0.977303	0.999984	XP_049882188.1|XP_049883388.1	http://www.genome.jp/kegg-bin/show_pathway?bmor03015/bmor:101737911%09red/bmor:101740532%09red
RNA transport	KEGG PATHWAY	bmor03013	4	122	0.994366	0.999984	XP_049884427.1|XP_049884891.1|XP_049865593.1|XP_049875986.1	http://www.genome.jp/kegg-bin/show_pathway?bmor03013/bmor:101735791%09red/bmor:101746229%09red/bmor:101736050%09red/bmor:101742358%09red
Ribosome biogenesis in eukaryotes	KEGG PATHWAY	bmor03008	1	69	0.997711	0.999984	XP_049874105.1	http://www.genome.jp/kegg-bin/show_pathway?bmor03008/bmor:101742367%09red
Spliceosome	KEGG PATHWAY	bmor03040	3	120	0.998318	0.999984	XP_049871162.1|XP_049878898.1|XP_049883186.1	http://www.genome.jp/kegg-bin/show_pathway?bmor03040/bmor:101740629%09red/bmor:101739300%09red/bmor:733093%09red
Ribosome	KEGG PATHWAY	bmor03010	1	126	0.999984	0.999984	XP_049881110.1	http://www.genome.jp/kegg-bin/show_pathway?bmor03010/bmor:692653%09red
--------------------
#Term	Database	ID	Input number	Background number	P-Value	Corrected P-Value	Input	Hyperlink
--------------------
#Term	Database	ID	Input number	Background number	P-Value	Corrected P-Value	Input	Hyperlink
--------------------
